# Supplementary material
Source: MDPI journal article supplement (https://www.mdpi.com/2227-7390/11/4/977)
Supplement: s1 [file s1]

Supplemental Material for

# AutoGAN: An Automated Human-Out-Of-The-Loop Approach for Training Generative Adversarial Networks

Ehsan Nazari\*, Paula Branco, and Guy-Vincent Jourdan

\*Corresponding author. Email: enaza030@uottawa.ca

## 1 Additional Figures with Results

This section includes all the figures with results from datasets that were not shown in the main manuscript.

### 1.1 tor-based datasets

Figure S1 shows the distribution of the F1 scores of the majority class. The main paper includes a similar figure focusing on the minority class scores distribution.

### 1.2 cic\_syscallsbinders\_adware-based datasets

Observing Figure S2 and Figure S3, we see that the F1 scores of the majority class have experienced a degree of deterioration, while minority class F1 score are improved by a greater extent.

### 1.3 cic\_syscallsbinders\_smsmalware-based datasets

We draw the following conclusions from Figure S4 and Figure S5: (1) The F1-scores of the majority class are affected minimally or not at all by CGAN as an over-sampling strategy, whereas the F1-scores of the minority class improve significantly; (2) For the most cases, the outcomes of the AutoGAN algorithm are near to (or even superior to) the 'Fixed' setting.

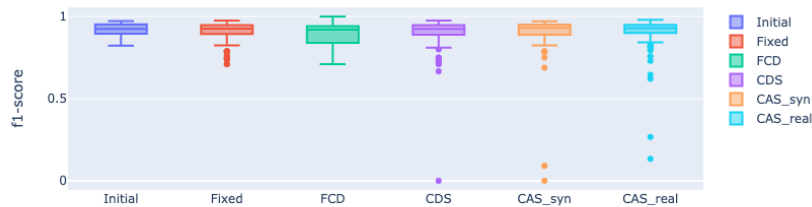

**Figure S1:** The box-plot of the F1-scores of the majority class by different oracles for tor-based datasets.

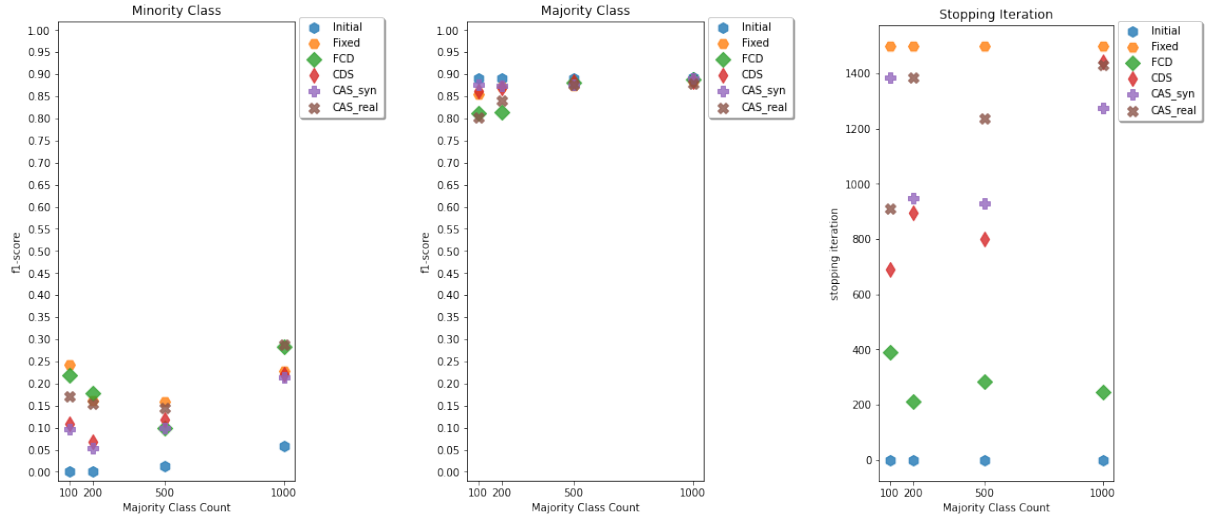

**Figure S2:** The average of the results for cic\_syscallsbinders\_adware-based datasets by majority class count.

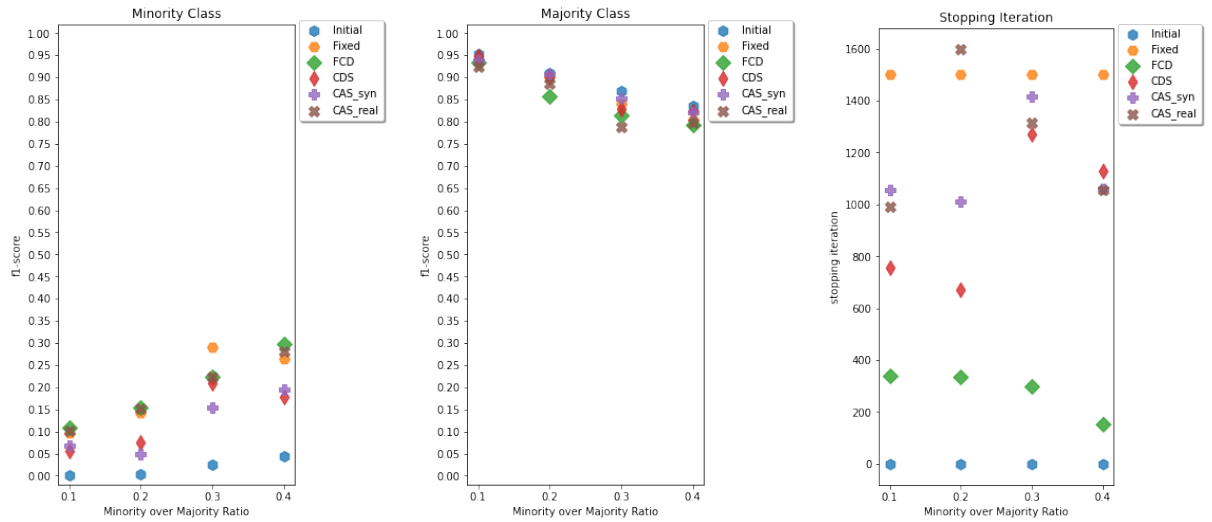

**Figure S3:** The average of the results for cic\_syscallsbinders\_adware-based datasets by imbalance ratio.

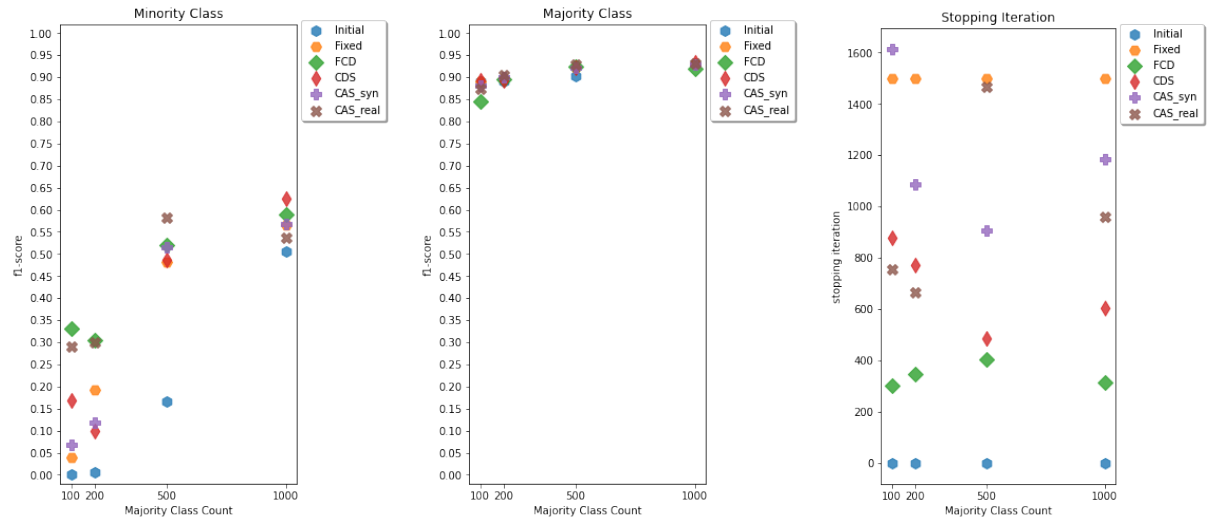

**Figure S4:** The average of the results for cic\_syscallsbinders\_smsmalware-based datasets by majority class count.

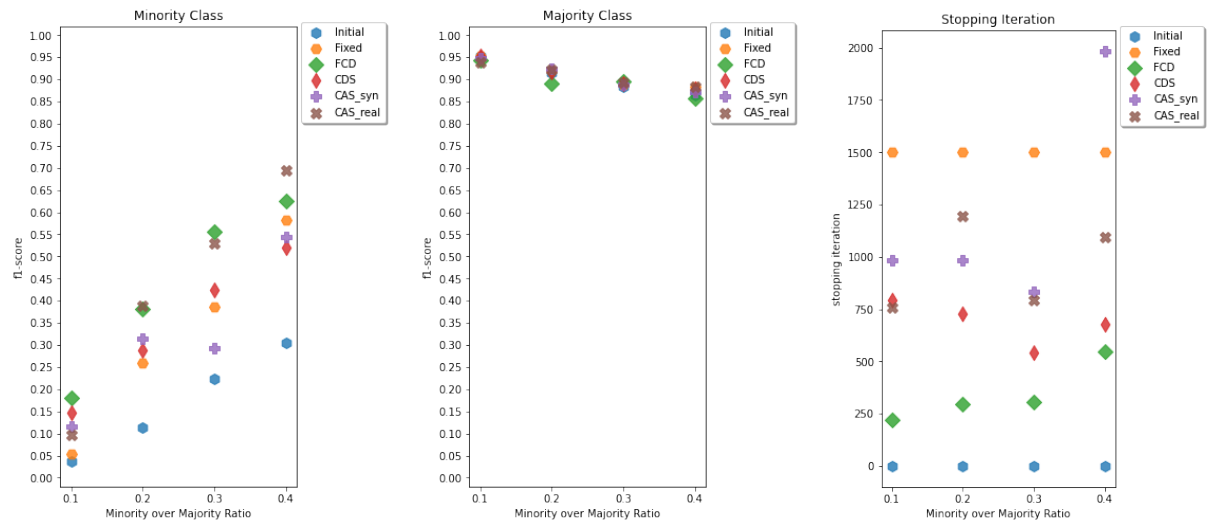

**Figure S5:** The average of the results for cic\_syscallsbinders\_smsmalware-based datasets by imbalance ratio.

## 1.4 cic\_syscalls\_adware-based datasets

The results of the experiments for cic\_syscalls\_adware dataset are brought in Figure S6 and Figure S7. The results for 'Initial' case show that the classifier performs very poorly in discerning the minority classes for all imbalance ratios and majority class sample sizes. When CGAN is used as an over-sampling technique, we also see that the F1-scores of the majority class decrease more than those of the other datasets. Secondly, the AutoGAN algorithm results are near to those of the 'Fixed' setting.

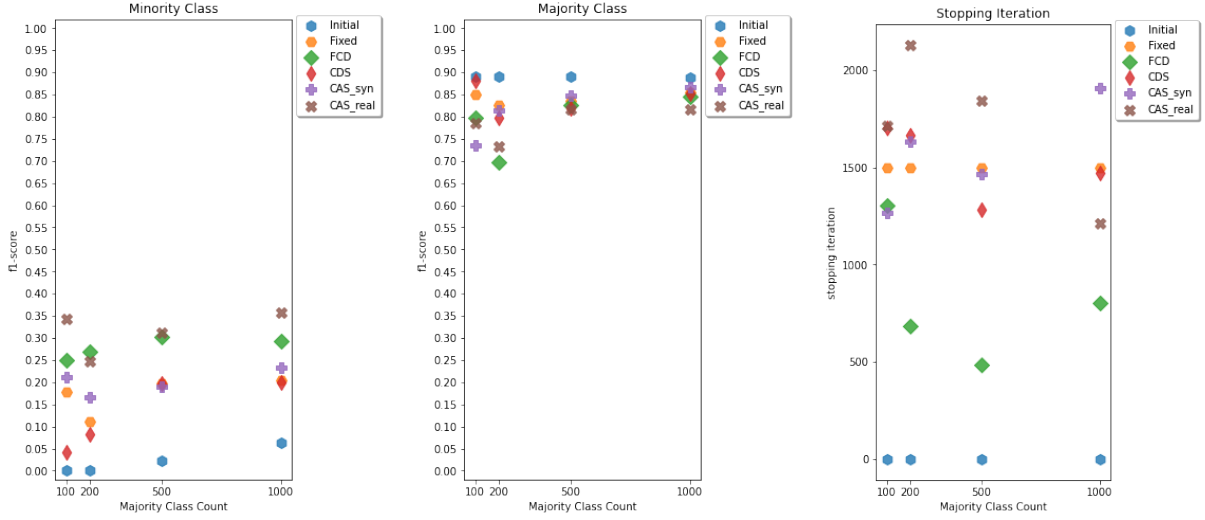

**Figure S6:** The average results of cic\_syscalls\_adware-based dataset by majority class count.

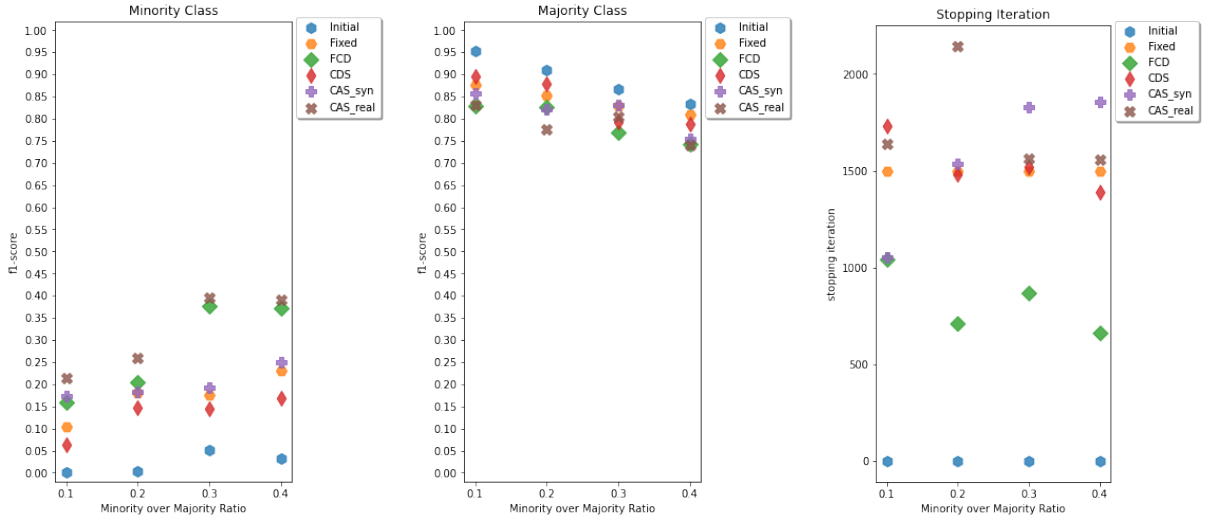

**Figure S7:** The average results of cic\_syscalls\_adware-based datasets by imbalance ratio.

## 1.5 iscx\_spam-based datasets

In Figure S8 and Figure S9 the results of the experiments for iscx\_spam dataset are brought. Compared to the previous cases, the results show that for the majority class count of 100 and 200 samples, the F1-scores of 'Initial' and over-sampling methods suggest a similar behaviour, but for the cases of

500 and 1000 samples, the classifier reaches a F1-score of more 85% before over-sampling; and after over-sampling the results do not improve at all. We can argue as the F1-score increases, the room for improvement shrinks and from a point on, very little improvement can be achieved. It is worth mentioning that in all cases the F1-score of the majority class did not deteriorate and even experiences minor improvements.

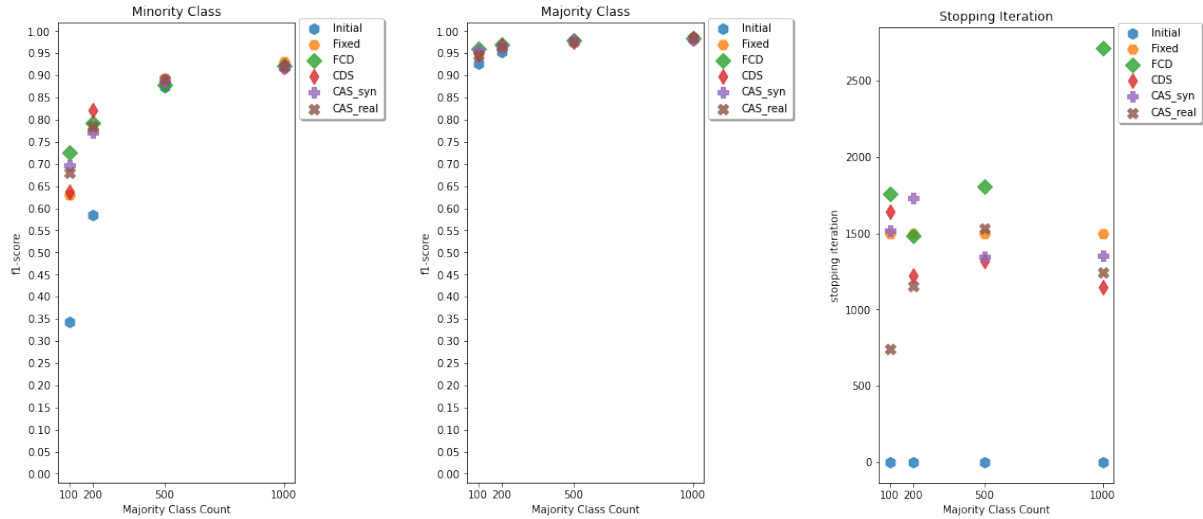

**Figure S8:** The average results of iscx\_spam-based datasets by majority class count.

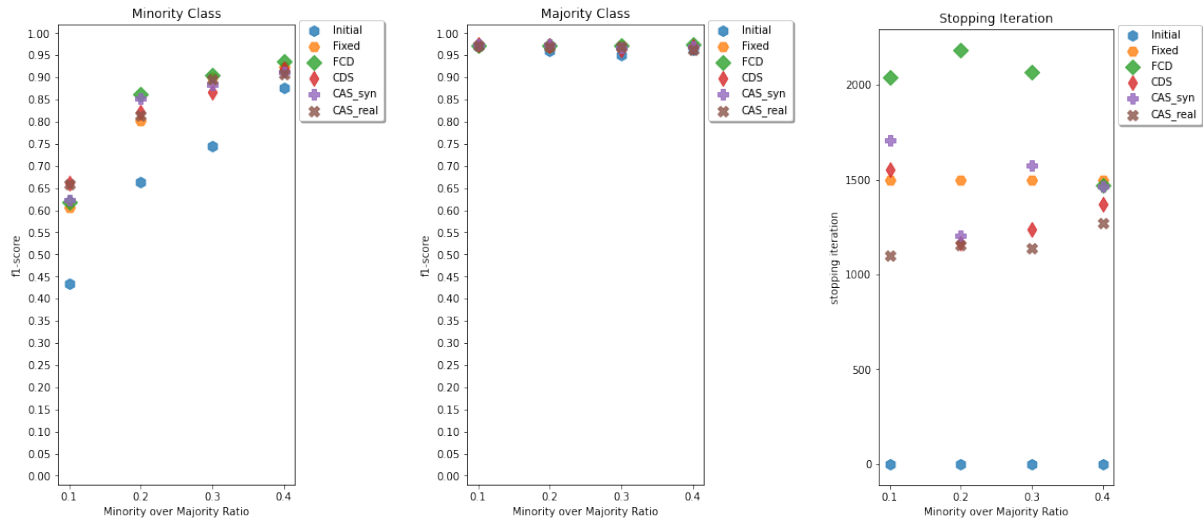

**Figure S9:** The average results of iscx\_spam-based dataset by imbalance ratio.

## 1.6 Kuzushiji-MNIST-based datasets

Figure S10 and Figure S11 show the results of kmnist16, and kmnist35 respectively. Similar to the trials based on MNIST-derived datasets, the AutoGAN approach achieved near performance increases in the minority class compared to the fixed number of iterations while consuming less iterations on average. Note that the results from kmnist12 are included in the main manuscript.

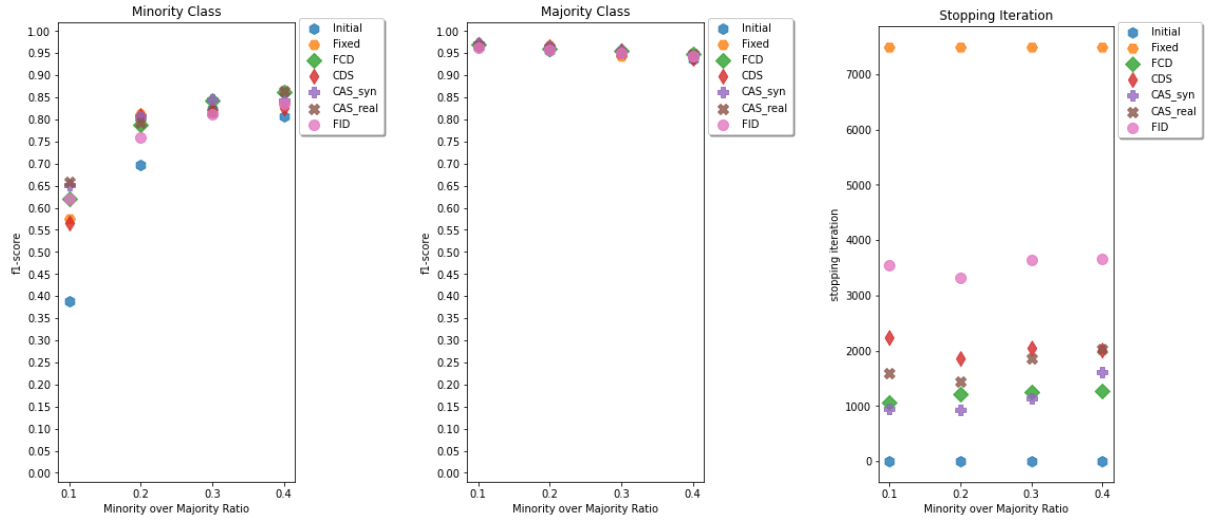

**Figure S10:** The average results of kmnist16 by the imbalance ratio for the minority class, majority class, and the number of iterations from left to right.

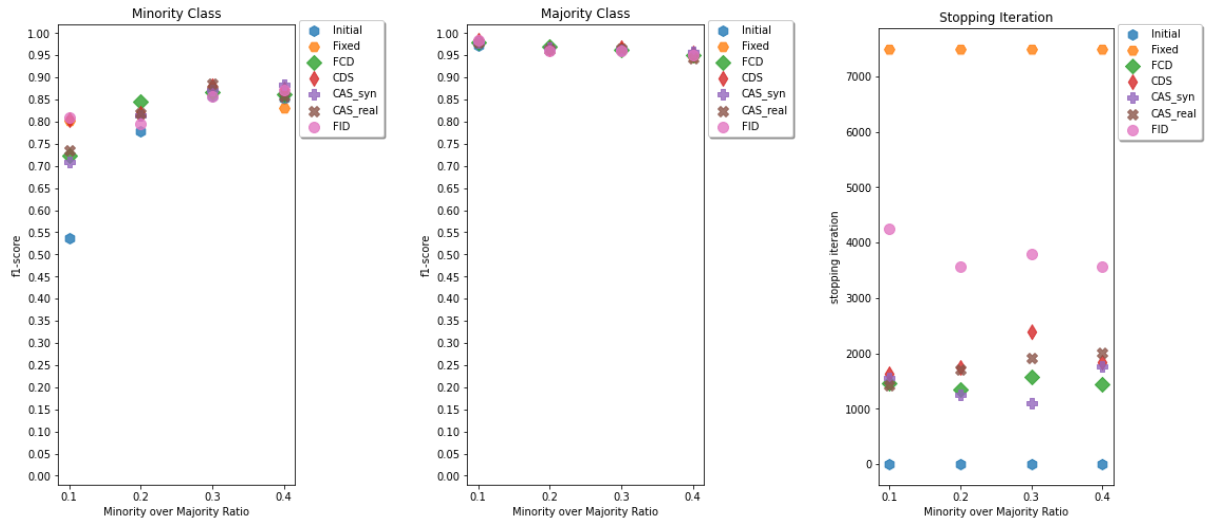

**Figure S11:** The average results of kmnist35 by the imbalance ratio for the minority class, majority class, and the number of iterations from left to right.

## 1.7 MNIST-based datasets

The results of mnist01, mnist23, and mnist38 are found in Figure S12, Figure S13, and Figure S14 respectively. On average, we can see that AutoGAN algorithm has obtained similar performance improvements in the minority class compared to the fixed number of iterations while using a lower number of iterations.

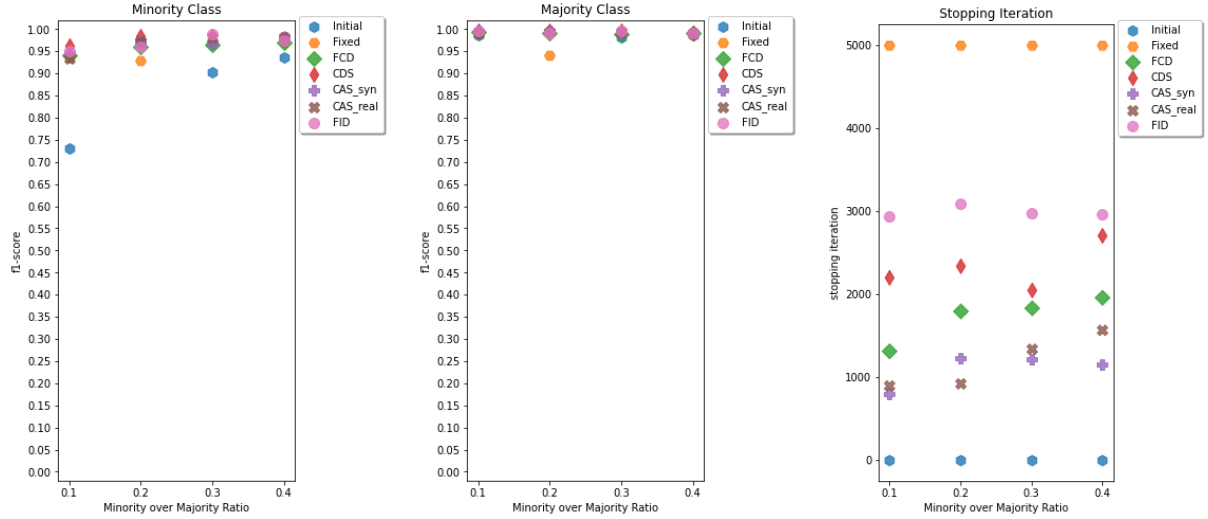

**Figure S12:** The average results of mnist01 by the imbalance ratio for the minority class, majority class, and the number of iterations from left to right.

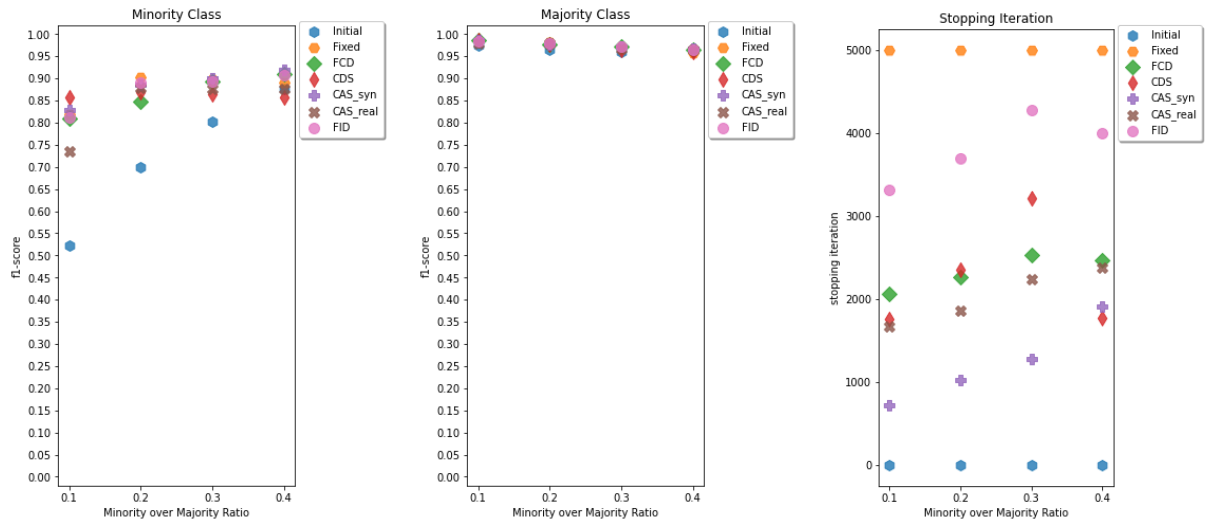

**Figure S13:** The average results of mnist23 by the imbalance ratio for the minority class, majority class, and the number of iterations from left to right.

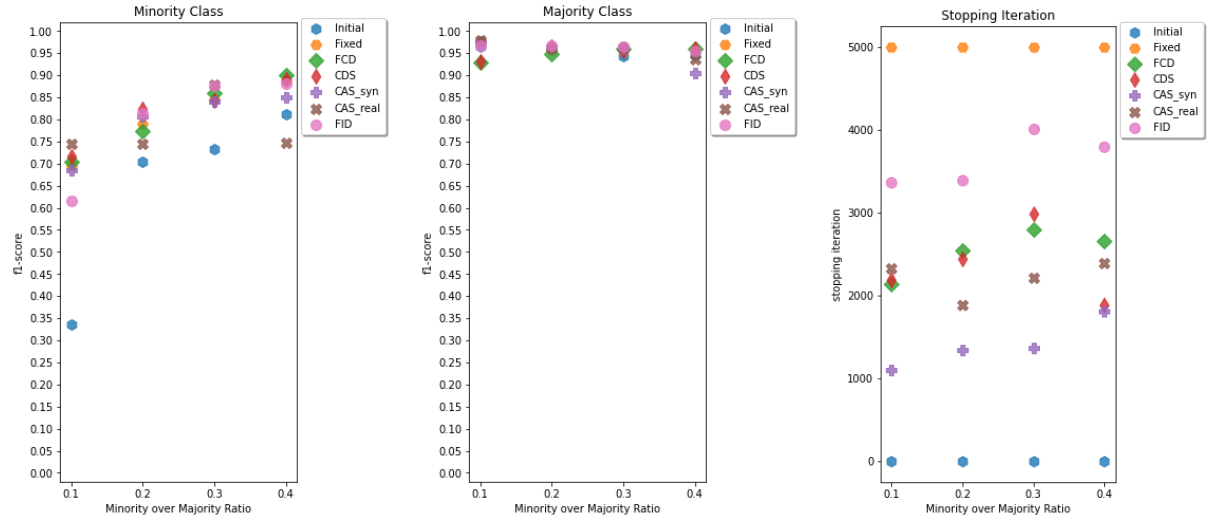

**Figure S14:** The average results of mnist38 by the imbalance ratio for the minority class, majority class, and the number of iterations from left to right.

## 2 Tables of Results

All the detailed results of our experiments are shown in this section. The average number of iterations and F1 score results of the created variants, per base dataset, aggregated according to either the imbalance ratios or the majority class count are shown below.



**Table S1:** The results of all cira-based datasets categorized by imbalance ratios.

| Method   | min_maj_rate | maj_F1( $\pm$ CI)%  | min_F1( $\pm$ CI)%  | Stopping Iteration( $\pm$ STD) |
|----------|--------------|---------------------|---------------------|--------------------------------|
| CAS_real | 0.1          | 93.89( $\pm$ 13.18) | 64.06( $\pm$ 12.11) | 1845( $\pm$ 1811)              |
|          | 0.2          | 95.58( $\pm$ 0.87)  | 68.69( $\pm$ 10.53) | 1305( $\pm$ 885)               |
|          | 0.3          | 93.32( $\pm$ 0.90)  | 69.12( $\pm$ 9.13)  | 1455( $\pm$ 1610)              |
|          | 0.4          | 91.46( $\pm$ 2.16)  | 77.56( $\pm$ 14.56) | 1070( $\pm$ 681)               |
| CAS_syn  | 0.1          | 92.16( $\pm$ 0.58)  | 56.50( $\pm$ 10.91) | 1415( $\pm$ 1705)              |
|          | 0.2          | 95.45( $\pm$ 1.11)  | 66.98( $\pm$ 8.42)  | 1885( $\pm$ 1883)              |
|          | 0.3          | 94.32( $\pm$ 1.94)  | 76.53( $\pm$ 12.31) | 2540( $\pm$ 2212)              |
|          | 0.4          | 93.30( $\pm$ 2.99)  | 79.97( $\pm$ 7.07)  | 2670( $\pm$ 1953)              |
| CDS      | 0.1          | 95.86( $\pm$ 2.90)  | 54.78( $\pm$ 8.17)  | 1140( $\pm$ 849)               |
|          | 0.2          | 94.37( $\pm$ 4.13)  | 68.96( $\pm$ 12.52) | 1165( $\pm$ 735)               |
|          | 0.3          | 92.44( $\pm$ 1.18)  | 70.77( $\pm$ 2.84)  | 860( $\pm$ 952)                |
|          | 0.4          | 95.21( $\pm$ 1.38)  | 85.86( $\pm$ 4.86)  | 935( $\pm$ 676)                |
| FCD      | 0.1          | 94.31( $\pm$ 1.20)  | 51.47( $\pm$ 13.98) | 775( $\pm$ 866)                |
|          | 0.2          | 91.61( $\pm$ 1.56)  | 66.23( $\pm$ 11.63) | 605( $\pm$ 557)                |
|          | 0.3          | 94.84( $\pm$ 3.35)  | 84.80( $\pm$ 13.50) | 510( $\pm$ 510)                |
|          | 0.4          | 93.67( $\pm$ 1.75)  | 83.12( $\pm$ 7.74)  | 535( $\pm$ 592)                |
| Fixed    | 0.1          | 95.73( $\pm$ 10.93) | 40.66( $\pm$ 10.06) | 1500( $\pm$ 0)                 |
|          | 0.2          | 93.95( $\pm$ 2.32)  | 62.79( $\pm$ 17.32) | 1500( $\pm$ 0)                 |
|          | 0.3          | 93.64( $\pm$ 1.77)  | 71.09( $\pm$ 11.37) | 1500( $\pm$ 0)                 |
|          | 0.4          | 92.14( $\pm$ 2.78)  | 73.59( $\pm$ 7.98)  | 1500( $\pm$ 0)                 |
| Initial  | 0.1          | 91.23( $\pm$ 7.32)  | 19.62( $\pm$ 7.13)  | -1( $\pm$ 0)                   |
|          | 0.2          | 93.47( $\pm$ 1.49)  | 34.72( $\pm$ 12.80) | -1( $\pm$ 0)                   |
|          | 0.3          | 92.62( $\pm$ 1.95)  | 51.06( $\pm$ 16.30) | -1( $\pm$ 0)                   |
|          | 0.4          | 92.80( $\pm$ 4.76)  | 68.96( $\pm$ 10.38) | -1( $\pm$ 0)                   |

**Table S2:** The results of all cira-based datasets categorized by majority class counts.

| Method   | maj_class_count | maj_F1( $\pm$ CI)%  | min_F1( $\pm$ CI)%  | Stopping Iteration( $\pm$ STD) |
|----------|-----------------|---------------------|---------------------|--------------------------------|
| CAS_real | 100             | 86.84( $\pm$ 12.42) | 38.81( $\pm$ 9.70)  | 1275( $\pm$ 1266)              |
|          | 200             | 92.08( $\pm$ 1.80)  | 64.05( $\pm$ 16.90) | 980( $\pm$ 697)                |
|          | 500             | 97.27( $\pm$ 0.65)  | 85.79( $\pm$ 6.57)  | 1845( $\pm$ 1809)              |
|          | 1000            | 98.06( $\pm$ 0.35)  | 90.78( $\pm$ 9.13)  | 1575( $\pm$ 1285)              |
| CAS_syn  | 100             | 85.15( $\pm$ 2.75)  | 36.10( $\pm$ 10.77) | 1580( $\pm$ 1354)              |
|          | 200             | 94.60( $\pm$ 2.79)  | 67.51( $\pm$ 15.67) | 2835( $\pm$ 2093)              |
|          | 500             | 97.05( $\pm$ 1.14)  | 84.05( $\pm$ 10.21) | 1640( $\pm$ 1857)              |
|          | 1000            | 98.42( $\pm$ 0.67)  | 92.33( $\pm$ 2.76)  | 2455( $\pm$ 2319)              |
| CDS      | 100             | 89.26( $\pm$ 5.61)  | 38.64( $\pm$ 8.43)  | 735( $\pm$ 625)                |
|          | 200             | 93.56( $\pm$ 3.07)  | 69.28( $\pm$ 14.68) | 890( $\pm$ 795)                |
|          | 500             | 97.00( $\pm$ 1.06)  | 82.39( $\pm$ 11.57) | 1150( $\pm$ 828)               |
|          | 1000            | 98.07( $\pm$ 0.81)  | 90.07( $\pm$ 7.80)  | 1325( $\pm$ 877)               |
| FCD      | 100             | 87.31( $\pm$ 1.96)  | 56.97( $\pm$ 22.66) | 680( $\pm$ 898)                |
|          | 200             | 93.14( $\pm$ 2.37)  | 60.28( $\pm$ 20.38) | 600( $\pm$ 634)                |
|          | 500             | 96.44( $\pm$ 0.98)  | 80.97( $\pm$ 8.21)  | 555( $\pm$ 529)                |
|          | 1000            | 97.54( $\pm$ 0.51)  | 87.41( $\pm$ 1.78)  | 590( $\pm$ 467)                |
| Fixed    | 100             | 87.13( $\pm$ 11.04) | 27.16( $\pm$ 28.33) | 1500( $\pm$ 0)                 |
|          | 200             | 93.53( $\pm$ 1.43)  | 51.93( $\pm$ 13.00) | 1500( $\pm$ 0)                 |
|          | 500             | 96.76( $\pm$ 0.68)  | 77.85( $\pm$ 2.82)  | 1500( $\pm$ 0)                 |
|          | 1000            | 98.04( $\pm$ 0.24)  | 91.18( $\pm$ 1.98)  | 1500( $\pm$ 0)                 |
| Initial  | 100             | 85.08( $\pm$ 7.02)  | 8.39( $\pm$ 10.69)  | -1( $\pm$ 0)                   |
|          | 200             | 91.41( $\pm$ 3.92)  | 23.33( $\pm$ 13.81) | -1( $\pm$ 0)                   |
|          | 500             | 95.42( $\pm$ 1.46)  | 54.85( $\pm$ 10.90) | -1( $\pm$ 0)                   |
|          | 1000            | 98.20( $\pm$ 0.91)  | 87.78( $\pm$ 4.88)  | -1( $\pm$ 0)                   |

**Table S3:** The results of all cic\_syscallsbinders\_smsmalware-based datasets categorized by imbalance ratios.

| Method   | min_maj_rate | maj_F1( $\pm$ CI)% | min_F1( $\pm$ CI)%  | Stopping Iteration( $\pm$ STD) |
|----------|--------------|--------------------|---------------------|--------------------------------|
| CAS_real | 0.1          | 93.87( $\pm$ 0.24) | 9.78( $\pm$ 10.26)  | 760( $\pm$ 639)                |
|          | 0.2          | 92.15( $\pm$ 0.65) | 38.79( $\pm$ 12.92) | 1195( $\pm$ 1015)              |
|          | 0.3          | 89.20( $\pm$ 1.21) | 52.93( $\pm$ 18.57) | 795( $\pm$ 1188)               |
|          | 0.4          | 88.39( $\pm$ 1.01) | 69.35( $\pm$ 11.58) | 1095( $\pm$ 1189)              |
| CAS_syn  | 0.1          | 94.84( $\pm$ 0.44) | 11.62( $\pm$ 9.25)  | 985( $\pm$ 794)                |
|          | 0.2          | 92.34( $\pm$ 0.50) | 31.43( $\pm$ 11.72) | 985( $\pm$ 710)                |
|          | 0.3          | 88.76( $\pm$ 1.48) | 29.37( $\pm$ 12.73) | 835( $\pm$ 607)                |
|          | 0.4          | 87.23( $\pm$ 1.57) | 54.44( $\pm$ 16.14) | 1985( $\pm$ 1526)              |
| CDS      | 0.1          | 95.38( $\pm$ 2.87) | 14.64( $\pm$ 15.46) | 795( $\pm$ 757)                |
|          | 0.2          | 91.75( $\pm$ 3.19) | 28.81( $\pm$ 12.21) | 730( $\pm$ 543)                |
|          | 0.3          | 89.05( $\pm$ 2.46) | 42.54( $\pm$ 15.36) | 540( $\pm$ 487)                |
|          | 0.4          | 87.89( $\pm$ 5.11) | 51.97( $\pm$ 10.90) | 675( $\pm$ 588)                |
| FCD      | 0.1          | 94.34( $\pm$ 0.62) | 18.03( $\pm$ 11.06) | 220( $\pm$ 105)                |
|          | 0.2          | 88.99( $\pm$ 1.25) | 38.14( $\pm$ 9.76)  | 295( $\pm$ 435)                |
|          | 0.3          | 89.54( $\pm$ 1.57) | 55.69( $\pm$ 17.78) | 305( $\pm$ 567)                |
|          | 0.4          | 85.70( $\pm$ 2.26) | 62.46( $\pm$ 18.91) | 545( $\pm$ 755)                |
| Fixed    | 0.1          | 95.17( $\pm$ 0.76) | 5.30( $\pm$ 16.70)  | 1500( $\pm$ 0)                 |
|          | 0.2          | 91.97( $\pm$ 0.69) | 25.96( $\pm$ 10.27) | 1500( $\pm$ 0)                 |
|          | 0.3          | 88.82( $\pm$ 1.03) | 38.52( $\pm$ 10.58) | 1500( $\pm$ 0)                 |
|          | 0.4          | 88.31( $\pm$ 4.94) | 58.12( $\pm$ 14.04) | 1500( $\pm$ 0)                 |
| Initial  | 0.1          | 95.32( $\pm$ 2.65) | 3.70( $\pm$ 8.19)   | -1( $\pm$ 0)                   |
|          | 0.2          | 91.49( $\pm$ 1.83) | 11.39( $\pm$ 14.87) | -1( $\pm$ 0)                   |
|          | 0.3          | 88.27( $\pm$ 2.50) | 22.23( $\pm$ 18.48) | -1( $\pm$ 0)                   |
|          | 0.4          | 86.56( $\pm$ 4.72) | 30.49( $\pm$ 9.14)  | -1( $\pm$ 0)                   |

**Table S4:** The results of all cic\_syscallsbinders\_smsmalware-based datasets categorized by majority class counts.

| Method   | maj_class_count | maj_F1( $\pm$ CI)% | min_F1( $\pm$ CI)%  | Stopping Iteration( $\pm$ STD) |
|----------|-----------------|--------------------|---------------------|--------------------------------|
| CAS_real | 100             | 87.29( $\pm$ 0.00) | 28.94( $\pm$ 0.00)  | 755( $\pm$ 573)                |
|          | 200             | 90.38( $\pm$ 0.12) | 29.94( $\pm$ 1.63)  | 665( $\pm$ 754)                |
|          | 500             | 92.89( $\pm$ 0.77) | 58.33( $\pm$ 4.10)  | 1465( $\pm$ 1514)              |
|          | 1000            | 93.05( $\pm$ 1.41) | 53.65( $\pm$ 26.87) | 960( $\pm$ 905)                |
| CAS_syn  | 100             | 88.03( $\pm$ 1.24) | 6.89( $\pm$ 10.80)  | 1615( $\pm$ 1067)              |
|          | 200             | 90.13( $\pm$ 1.61) | 11.72( $\pm$ 16.23) | 1085( $\pm$ 1109)              |
|          | 500             | 92.22( $\pm$ 1.30) | 51.55( $\pm$ 10.18) | 905( $\pm$ 740)                |
|          | 1000            | 92.79( $\pm$ 1.20) | 56.69( $\pm$ 15.55) | 1185( $\pm$ 1230)              |
| CDS      | 100             | 89.26( $\pm$ 7.49) | 16.76( $\pm$ 26.27) | 880( $\pm$ 731)                |
|          | 200             | 89.23( $\pm$ 3.17) | 9.91( $\pm$ 14.01)  | 770( $\pm$ 716)                |
|          | 500             | 92.12( $\pm$ 0.75) | 48.67( $\pm$ 8.51)  | 485( $\pm$ 308)                |
|          | 1000            | 93.46( $\pm$ 2.67) | 62.63( $\pm$ 18.24) | 605( $\pm$ 499)                |
| FCD      | 100             | 84.59( $\pm$ 2.42) | 33.01( $\pm$ 7.62)  | 300( $\pm$ 389)                |
|          | 200             | 89.54( $\pm$ 0.85) | 30.49( $\pm$ 11.48) | 345( $\pm$ 468)                |
|          | 500             | 92.50( $\pm$ 0.90) | 51.89( $\pm$ 11.21) | 405( $\pm$ 770)                |
|          | 1000            | 91.93( $\pm$ 0.85) | 58.92( $\pm$ 10.33) | 315( $\pm$ 431)                |
| Fixed    | 100             | 89.16( $\pm$ 3.10) | 3.89( $\pm$ 8.54)   | 1500( $\pm$ 0)                 |
|          | 200             | 89.86( $\pm$ 1.66) | 19.18( $\pm$ 18.12) | 1500( $\pm$ 0)                 |
|          | 500             | 92.06( $\pm$ 1.66) | 48.22( $\pm$ 22.54) | 1500( $\pm$ 0)                 |
|          | 1000            | 93.18( $\pm$ 1.71) | 56.61( $\pm$ 14.75) | 1500( $\pm$ 0)                 |
| Initial  | 100             | 89.11( $\pm$ 5.00) | 0.00( $\pm$ 12.47)  | -1( $\pm$ 0)                   |
|          | 200             | 89.15( $\pm$ 1.80) | 0.59( $\pm$ 16.67)  | -1( $\pm$ 0)                   |
|          | 500             | 90.34( $\pm$ 0.88) | 16.57( $\pm$ 9.00)  | -1( $\pm$ 0)                   |
|          | 1000            | 93.04( $\pm$ 1.17) | 50.65( $\pm$ 14.29) | -1( $\pm$ 0)                   |

**Table S5:** The results of all cic\_syscallsbinders\_adware-based datasets categorized by imbalance ratios.

| Method   | min_maj_rate | maj_F1( $\pm$ CI)%  | min_F1( $\pm$ CI)%  | Stopping Iteration( $\pm$ STD) |
|----------|--------------|---------------------|---------------------|--------------------------------|
| CAS_real | 0.1          | 92.46( $\pm$ 0.00)  | 10.22( $\pm$ 0.00)  | 990( $\pm$ 821)                |
|          | 0.2          | 88.47( $\pm$ 0.03)  | 15.23( $\pm$ 0.68)  | 1600( $\pm$ 1076)              |
|          | 0.3          | 78.79( $\pm$ 0.07)  | 22.36( $\pm$ 6.09)  | 1315( $\pm$ 683)               |
|          | 0.4          | 79.78( $\pm$ 0.19)  | 28.09( $\pm$ 4.47)  | 1055( $\pm$ 1065)              |
| CAS_syn  | 0.1          | 93.75( $\pm$ 0.56)  | 6.68( $\pm$ 15.52)  | 1055( $\pm$ 944)               |
|          | 0.2          | 90.62( $\pm$ 1.30)  | 4.91( $\pm$ 6.45)   | 1010( $\pm$ 723)               |
|          | 0.3          | 85.22( $\pm$ 2.69)  | 15.38( $\pm$ 11.90) | 1415( $\pm$ 987)               |
|          | 0.4          | 82.03( $\pm$ 2.65)  | 19.48( $\pm$ 12.41) | 1060( $\pm$ 866)               |
| CDS      | 0.1          | 94.88( $\pm$ 4.79)  | 5.53( $\pm$ 14.07)  | 755( $\pm$ 775)                |
|          | 0.2          | 89.97( $\pm$ 5.66)  | 7.43( $\pm$ 9.09)   | 670( $\pm$ 517)                |
|          | 0.3          | 82.76( $\pm$ 7.80)  | 20.80( $\pm$ 20.96) | 1270( $\pm$ 1371)              |
|          | 0.4          | 82.46( $\pm$ 7.40)  | 17.89( $\pm$ 16.47) | 1130( $\pm$ 1307)              |
| FCD      | 0.1          | 93.44( $\pm$ 0.31)  | 10.88( $\pm$ 11.09) | 340( $\pm$ 308)                |
|          | 0.2          | 85.68( $\pm$ 1.61)  | 15.30( $\pm$ 9.45)  | 335( $\pm$ 364)                |
|          | 0.3          | 81.32( $\pm$ 6.20)  | 22.23( $\pm$ 10.75) | 300( $\pm$ 312)                |
|          | 0.4          | 79.18( $\pm$ 1.91)  | 29.75( $\pm$ 12.17) | 155( $\pm$ 51)                 |
| Fixed    | 0.1          | 94.11( $\pm$ 1.62)  | 9.71( $\pm$ 1.32)   | 1500( $\pm$ 0)                 |
|          | 0.2          | 89.96( $\pm$ 1.09)  | 14.24( $\pm$ 7.10)  | 1500( $\pm$ 0)                 |
|          | 0.3          | 83.98( $\pm$ 0.93)  | 28.93( $\pm$ 12.35) | 1500( $\pm$ 0)                 |
|          | 0.4          | 80.42( $\pm$ 3.75)  | 26.30( $\pm$ 11.52) | 1500( $\pm$ 0)                 |
| Initial  | 0.1          | 95.24( $\pm$ 3.04)  | 0.00( $\pm$ 10.35)  | -1( $\pm$ 0)                   |
|          | 0.2          | 90.92( $\pm$ 2.27)  | 0.24( $\pm$ 6.01)   | -1( $\pm$ 0)                   |
|          | 0.3          | 87.00( $\pm$ 10.35) | 2.60( $\pm$ 14.70)  | -1( $\pm$ 0)                   |
|          | 0.4          | 83.53( $\pm$ 3.20)  | 4.37( $\pm$ 13.99)  | -1( $\pm$ 0)                   |

**Table S6:** The results of all cic\_syscallsbinders\_adware-based datasets categorized by majority class counts.

| Method   | maj_class_count | maj_F1( $\pm$ CI)%  | min_F1( $\pm$ CI)%  | Stopping Iteration( $\pm$ STD) |
|----------|-----------------|---------------------|---------------------|--------------------------------|
| CAS_real | 100             | 80.18( $\pm$ 0.00)  | 17.18( $\pm$ 0.00)  | 910( $\pm$ 509)                |
|          | 200             | 84.01( $\pm$ 0.00)  | 15.42( $\pm$ 0.00)  | 1385( $\pm$ 1093)              |
|          | 500             | 87.52( $\pm$ 0.05)  | 14.55( $\pm$ 2.80)  | 1235( $\pm$ 1092)              |
|          | 1000            | 87.79( $\pm$ 0.25)  | 28.75( $\pm$ 8.23)  | 1430( $\pm$ 925)               |
| CAS_syn  | 100             | 87.68( $\pm$ 3.39)  | 9.73( $\pm$ 10.84)  | 1385( $\pm$ 951)               |
|          | 200             | 87.29( $\pm$ 1.62)  | 5.30( $\pm$ 12.10)  | 950( $\pm$ 784)                |
|          | 500             | 87.56( $\pm$ 1.29)  | 10.01( $\pm$ 6.90)  | 930( $\pm$ 840)                |
|          | 1000            | 89.09( $\pm$ 1.17)  | 21.41( $\pm$ 9.94)  | 1275( $\pm$ 927)               |
| CDS      | 100             | 86.26( $\pm$ 10.11) | 10.89( $\pm$ 8.36)  | 690( $\pm$ 541)                |
|          | 200             | 86.98( $\pm$ 5.32)  | 6.70( $\pm$ 8.60)   | 895( $\pm$ 719)                |
|          | 500             | 88.43( $\pm$ 1.47)  | 11.90( $\pm$ 6.60)  | 800( $\pm$ 796)                |
|          | 1000            | 88.40( $\pm$ 0.78)  | 22.15( $\pm$ 13.57) | 1440( $\pm$ 1711)              |
| FCD      | 100             | 81.24( $\pm$ 4.56)  | 21.88( $\pm$ 15.14) | 390( $\pm$ 395)                |
|          | 200             | 81.46( $\pm$ 2.88)  | 17.91( $\pm$ 6.28)  | 210( $\pm$ 151)                |
|          | 500             | 88.01( $\pm$ 1.17)  | 10.01( $\pm$ 8.09)  | 285( $\pm$ 297)                |
|          | 1000            | 88.91( $\pm$ 3.14)  | 28.35( $\pm$ 13.28) | 245( $\pm$ 254)                |
| Fixed    | 100             | 85.57( $\pm$ 1.64)  | 24.24( $\pm$ 9.58)  | 1500( $\pm$ 0)                 |
|          | 200             | 87.17( $\pm$ 1.65)  | 16.21( $\pm$ 6.86)  | 1500( $\pm$ 0)                 |
|          | 500             | 87.41( $\pm$ 3.35)  | 16.00( $\pm$ 9.62)  | 1500( $\pm$ 0)                 |
|          | 1000            | 88.32( $\pm$ 1.47)  | 22.74( $\pm$ 12.97) | 1500( $\pm$ 0)                 |
| Initial  | 100             | 89.11( $\pm$ 12.76) | 0.00( $\pm$ 9.90)   | -1( $\pm$ 0)                   |
|          | 200             | 89.11( $\pm$ 1.58)  | 0.00( $\pm$ 10.35)  | -1( $\pm$ 0)                   |
|          | 500             | 89.14( $\pm$ 1.29)  | 1.29( $\pm$ 4.32)   | -1( $\pm$ 0)                   |
|          | 1000            | 89.33( $\pm$ 0.99)  | 5.92( $\pm$ 2.61)   | -1( $\pm$ 0)                   |

**Table S7:** The results of all cic\_syscalls\_adware-based datasets categorized by imbalance ratios.

| Method   | min_maj_rate | maj_F1( $\pm$ CI)%  | min_F1( $\pm$ CI)%  | Stopping Iteration( $\pm$ STD) |
|----------|--------------|---------------------|---------------------|--------------------------------|
| CAS_real | 0.1          | 83.04( $\pm$ 0.00)  | 21.38( $\pm$ 0.00)  | 1640( $\pm$ 919)               |
|          | 0.2          | 77.59( $\pm$ 0.03)  | 25.95( $\pm$ 0.68)  | 2145( $\pm$ 1350)              |
|          | 0.3          | 80.37( $\pm$ 0.72)  | 39.67( $\pm$ 4.96)  | 1560( $\pm$ 948)               |
|          | 0.4          | 74.12( $\pm$ 0.41)  | 39.05( $\pm$ 3.01)  | 1555( $\pm$ 1612)              |
| CAS_syn  | 0.1          | 85.72( $\pm$ 11.38) | 17.29( $\pm$ 11.42) | 1050( $\pm$ 1020)              |
|          | 0.2          | 82.03( $\pm$ 4.52)  | 18.22( $\pm$ 8.54)  | 1535( $\pm$ 1025)              |
|          | 0.3          | 83.04( $\pm$ 5.61)  | 19.27( $\pm$ 13.58) | 1830( $\pm$ 947)               |
|          | 0.4          | 75.47( $\pm$ 2.68)  | 25.09( $\pm$ 11.14) | 1855( $\pm$ 867)               |
| CDS      | 0.1          | 89.48( $\pm$ 10.14) | 6.26( $\pm$ 12.99)  | 1730( $\pm$ 1383)              |
|          | 0.2          | 87.77( $\pm$ 9.68)  | 14.58( $\pm$ 20.79) | 1480( $\pm$ 1025)              |
|          | 0.3          | 79.22( $\pm$ 10.38) | 14.48( $\pm$ 13.49) | 1520( $\pm$ 845)               |
|          | 0.4          | 78.68( $\pm$ 7.94)  | 16.90( $\pm$ 18.95) | 1390( $\pm$ 957)               |
| FCD      | 0.1          | 82.93( $\pm$ 10.30) | 15.87( $\pm$ 6.30)  | 1040( $\pm$ 1007)              |
|          | 0.2          | 82.62( $\pm$ 3.08)  | 20.48( $\pm$ 11.16) | 710( $\pm$ 676)                |
|          | 0.3          | 76.77( $\pm$ 10.51) | 37.68( $\pm$ 16.19) | 870( $\pm$ 684)                |
|          | 0.4          | 74.30( $\pm$ 7.41)  | 37.19( $\pm$ 8.94)  | 660( $\pm$ 648)                |
| Fixed    | 0.1          | 87.62( $\pm$ 9.27)  | 10.40( $\pm$ 10.10) | 1500( $\pm$ 0)                 |
|          | 0.2          | 85.32( $\pm$ 15.76) | 17.96( $\pm$ 11.85) | 1500( $\pm$ 0)                 |
|          | 0.3          | 82.80( $\pm$ 5.10)  | 17.47( $\pm$ 16.14) | 1500( $\pm$ 0)                 |
|          | 0.4          | 80.99( $\pm$ 6.39)  | 22.98( $\pm$ 9.84)  | 1500( $\pm$ 0)                 |
| Initial  | 0.1          | 95.24( $\pm$ 5.15)  | 0.00( $\pm$ 7.66)   | -1( $\pm$ 0)                   |
|          | 0.2          | 90.92( $\pm$ 14.28) | 0.24( $\pm$ 12.65)  | -1( $\pm$ 0)                   |
|          | 0.3          | 86.74( $\pm$ 5.36)  | 5.16( $\pm$ 9.27)   | -1( $\pm$ 0)                   |
|          | 0.4          | 83.24( $\pm$ 3.61)  | 3.28( $\pm$ 16.09)  | -1( $\pm$ 0)                   |

**Table S8:** The results of all cic\_syscalls\_adware-based datasets categorized by majority class counts.

| Method   | maj_class_count | maj_F1( $\pm$ CI)%  | min_F1( $\pm$ CI)%  | Stopping Iteration( $\pm$ STD) |
|----------|-----------------|---------------------|---------------------|--------------------------------|
| CAS_real | 100             | 78.59( $\pm$ 0.00)  | 34.36( $\pm$ 0.00)  | 1715( $\pm$ 1057)              |
|          | 200             | 73.20( $\pm$ 0.00)  | 24.82( $\pm$ 0.00)  | 2130( $\pm$ 1258)              |
|          | 500             | 81.74( $\pm$ 0.47)  | 31.18( $\pm$ 2.99)  | 1845( $\pm$ 1635)              |
|          | 1000            | 81.59( $\pm$ 0.72)  | 35.69( $\pm$ 4.80)  | 1210( $\pm$ 760)               |
| CAS_syn  | 100             | 73.58( $\pm$ 7.24)  | 21.09( $\pm$ 13.72) | 1265( $\pm$ 942)               |
|          | 200             | 81.45( $\pm$ 5.62)  | 16.51( $\pm$ 12.38) | 1635( $\pm$ 1008)              |
|          | 500             | 84.68( $\pm$ 3.27)  | 19.04( $\pm$ 6.92)  | 1465( $\pm$ 1013)              |
|          | 1000            | 86.56( $\pm$ 5.01)  | 23.23( $\pm$ 8.01)  | 1905( $\pm$ 1010)              |
| CDS      | 100             | 88.19( $\pm$ 16.41) | 4.25( $\pm$ 17.06)  | 1705( $\pm$ 1240)              |
|          | 200             | 79.63( $\pm$ 13.57) | 8.23( $\pm$ 10.48)  | 1665( $\pm$ 1022)              |
|          | 500             | 81.99( $\pm$ 2.07)  | 19.83( $\pm$ 12.75) | 1280( $\pm$ 993)               |
|          | 1000            | 85.35( $\pm$ 3.01)  | 19.91( $\pm$ 10.72) | 1470( $\pm$ 985)               |
| FCD      | 100             | 79.78( $\pm$ 2.14)  | 24.95( $\pm$ 8.50)  | 1305( $\pm$ 576)               |
|          | 200             | 69.65( $\pm$ 14.43) | 26.84( $\pm$ 10.66) | 685( $\pm$ 586)                |
|          | 500             | 82.72( $\pm$ 6.06)  | 30.18( $\pm$ 14.74) | 485( $\pm$ 470)                |
|          | 1000            | 84.47( $\pm$ 3.83)  | 29.25( $\pm$ 4.51)  | 805( $\pm$ 1082)               |
| Fixed    | 100             | 85.03( $\pm$ 22.92) | 17.70( $\pm$ 17.88) | 1500( $\pm$ 0)                 |
|          | 200             | 82.57( $\pm$ 6.88)  | 11.12( $\pm$ 11.70) | 1500( $\pm$ 0)                 |
|          | 500             | 83.64( $\pm$ 4.66)  | 19.66( $\pm$ 11.12) | 1500( $\pm$ 0)                 |
|          | 1000            | 85.48( $\pm$ 3.73)  | 20.33( $\pm$ 6.17)  | 1500( $\pm$ 0)                 |
| Initial  | 100             | 89.11( $\pm$ 8.15)  | 0.00( $\pm$ 5.55)   | -1( $\pm$ 0)                   |
|          | 200             | 89.11( $\pm$ 13.23) | 0.00( $\pm$ 14.39)  | -1( $\pm$ 0)                   |
|          | 500             | 89.06( $\pm$ 9.96)  | 2.29( $\pm$ 17.52)  | -1( $\pm$ 0)                   |
|          | 1000            | 88.87( $\pm$ 2.09)  | 6.40( $\pm$ 9.55)   | -1( $\pm$ 0)                   |



**Table S9:** The results of all iscx\_spam-based datasets categorized by imbalance ratios.

| Method   | min_maj_rate | maj_F1( $\pm$ CI)% | min_F1( $\pm$ CI)%  | Stopping Iteration( $\pm$ STD) |
|----------|--------------|--------------------|---------------------|--------------------------------|
| CAS_real | 0.1          | 97.27( $\pm$ 0.49) | 65.88( $\pm$ 10.44) | 1100( $\pm$ 803)               |
|          | 0.2          | 96.90( $\pm$ 1.27) | 81.37( $\pm$ 16.26) | 1155( $\pm$ 1079)              |
|          | 0.3          | 97.06( $\pm$ 0.99) | 89.49( $\pm$ 11.16) | 1140( $\pm$ 816)               |
|          | 0.4          | 96.18( $\pm$ 2.53) | 90.67( $\pm$ 11.20) | 1270( $\pm$ 1236)              |
| CAS_syn  | 0.1          | 97.50( $\pm$ 0.34) | 62.27( $\pm$ 14.81) | 1705( $\pm$ 609)               |
|          | 0.2          | 97.41( $\pm$ 0.63) | 85.27( $\pm$ 7.12)  | 1205( $\pm$ 491)               |
|          | 0.3          | 96.70( $\pm$ 1.66) | 88.29( $\pm$ 6.17)  | 1575( $\pm$ 744)               |
|          | 0.4          | 96.84( $\pm$ 2.08) | 91.26( $\pm$ 5.07)  | 1465( $\pm$ 757)               |
| CDS      | 0.1          | 97.55( $\pm$ 0.31) | 65.99( $\pm$ 13.64) | 1555( $\pm$ 966)               |
|          | 0.2          | 97.17( $\pm$ 0.94) | 82.01( $\pm$ 4.47)  | 1165( $\pm$ 870)               |
|          | 0.3          | 96.20( $\pm$ 1.14) | 86.69( $\pm$ 3.11)  | 1240( $\pm$ 783)               |
|          | 0.4          | 96.96( $\pm$ 1.70) | 91.85( $\pm$ 4.52)  | 1370( $\pm$ 847)               |
| FCD      | 0.1          | 97.28( $\pm$ 1.02) | 61.71( $\pm$ 15.78) | 2040( $\pm$ 1966)              |
|          | 0.2          | 97.21( $\pm$ 1.05) | 86.27( $\pm$ 11.55) | 2185( $\pm$ 1601)              |
|          | 0.3          | 97.13( $\pm$ 1.97) | 90.44( $\pm$ 7.28)  | 2065( $\pm$ 1393)              |
|          | 0.4          | 97.52( $\pm$ 1.64) | 93.60( $\pm$ 5.17)  | 1470( $\pm$ 1122)              |
| Fixed    | 0.1          | 97.25( $\pm$ 1.08) | 60.56( $\pm$ 20.91) | 1500( $\pm$ 0)                 |
|          | 0.2          | 96.84( $\pm$ 1.16) | 80.34( $\pm$ 7.43)  | 1500( $\pm$ 0)                 |
|          | 0.3          | 97.29( $\pm$ 1.72) | 90.03( $\pm$ 7.19)  | 1500( $\pm$ 0)                 |
|          | 0.4          | 96.89( $\pm$ 1.78) | 92.45( $\pm$ 5.77)  | 1500( $\pm$ 0)                 |
| Initial  | 0.1          | 96.86( $\pm$ 0.94) | 43.47( $\pm$ 16.66) | -1( $\pm$ 0)                   |
|          | 0.2          | 95.90( $\pm$ 1.14) | 66.36( $\pm$ 9.79)  | -1( $\pm$ 0)                   |
|          | 0.3          | 95.13( $\pm$ 1.81) | 74.37( $\pm$ 6.59)  | -1( $\pm$ 0)                   |
|          | 0.4          | 96.33( $\pm$ 2.81) | 87.62( $\pm$ 6.53)  | -1( $\pm$ 0)                   |

**Table S10:** The results of all iscx\_spam-based datasets categorized by majority class counts.

| Method   | maj_class_count | maj_F1( $\pm$ CI)% | min_F1( $\pm$ CI)%  | Stopping Iteration( $\pm$ STD) |
|----------|-----------------|--------------------|---------------------|--------------------------------|
| CAS_real | 100             | 94.67( $\pm$ 2.73) | 67.95( $\pm$ 24.42) | 740( $\pm$ 690)                |
|          | 200             | 96.55( $\pm$ 1.64) | 78.55( $\pm$ 11.18) | 1150( $\pm$ 918)               |
|          | 500             | 97.76( $\pm$ 0.32) | 88.95( $\pm$ 3.70)  | 1530( $\pm$ 1149)              |
|          | 1000            | 98.43( $\pm$ 0.25) | 91.96( $\pm$ 0.54)  | 1245( $\pm$ 1021)              |
| CAS_syn  | 100             | 95.76( $\pm$ 1.83) | 69.61( $\pm$ 9.85)  | 1520( $\pm$ 595)               |
|          | 200             | 96.59( $\pm$ 0.96) | 77.02( $\pm$ 11.30) | 1730( $\pm$ 666)               |
|          | 500             | 97.88( $\pm$ 0.70) | 88.67( $\pm$ 4.05)  | 1345( $\pm$ 752)               |
|          | 1000            | 98.22( $\pm$ 0.23) | 91.80( $\pm$ 1.09)  | 1355( $\pm$ 646)               |
| CDS      | 100             | 94.81( $\pm$ 1.77) | 63.70( $\pm$ 10.11) | 1640( $\pm$ 754)               |
|          | 200             | 96.83( $\pm$ 1.48) | 82.22( $\pm$ 14.01) | 1225( $\pm$ 794)               |
|          | 500             | 97.79( $\pm$ 0.33) | 88.75( $\pm$ 3.08)  | 1320( $\pm$ 907)               |
|          | 1000            | 98.45( $\pm$ 0.18) | 91.87( $\pm$ 1.40)  | 1145( $\pm$ 971)               |
| FCD      | 100             | 96.02( $\pm$ 1.63) | 72.59( $\pm$ 13.19) | 1760( $\pm$ 1441)              |
|          | 200             | 96.92( $\pm$ 1.40) | 79.27( $\pm$ 8.59)  | 1480( $\pm$ 1122)              |
|          | 500             | 97.80( $\pm$ 0.66) | 87.91( $\pm$ 3.10)  | 1805( $\pm$ 1725)              |
|          | 1000            | 98.40( $\pm$ 0.23) | 92.24( $\pm$ 1.57)  | 2715( $\pm$ 1651)              |
| Fixed    | 100             | 94.98( $\pm$ 2.56) | 63.06( $\pm$ 21.41) | 1500( $\pm$ 0)                 |
|          | 200             | 96.78( $\pm$ 1.49) | 77.87( $\pm$ 13.47) | 1500( $\pm$ 0)                 |
|          | 500             | 97.95( $\pm$ 0.54) | 89.36( $\pm$ 4.32)  | 1500( $\pm$ 0)                 |
|          | 1000            | 98.56( $\pm$ 0.39) | 93.09( $\pm$ 1.64)  | 1500( $\pm$ 0)                 |
| Initial  | 100             | 92.63( $\pm$ 2.95) | 34.28( $\pm$ 13.12) | -1( $\pm$ 0)                   |
|          | 200             | 95.39( $\pm$ 1.30) | 58.38( $\pm$ 3.59)  | -1( $\pm$ 0)                   |
|          | 500             | 97.82( $\pm$ 0.51) | 87.30( $\pm$ 4.50)  | -1( $\pm$ 0)                   |
|          | 1000            | 98.37( $\pm$ 0.22) | 91.86( $\pm$ 2.08)  | -1( $\pm$ 0)                   |

**Table S11:** The results of all iscx\_defacement-based datasets categorized by imbalance ratios.

| Method   | min_maj_rate | maj_F1( $\pm$ CI)% | min_F1( $\pm$ CI)%  | Stopping Iteration( $\pm$ STD) |
|----------|--------------|--------------------|---------------------|--------------------------------|
| CAS_real | 0.1          | 97.96( $\pm$ 0.66) | 74.28( $\pm$ 8.76)  | 1040( $\pm$ 843)               |
|          | 0.2          | 95.70( $\pm$ 0.55) | 77.46( $\pm$ 3.64)  | 2140( $\pm$ 1641)              |
|          | 0.3          | 94.71( $\pm$ 1.71) | 81.31( $\pm$ 5.17)  | 1945( $\pm$ 1903)              |
|          | 0.4          | 94.63( $\pm$ 1.48) | 85.82( $\pm$ 4.41)  | 2025( $\pm$ 1611)              |
| CAS_syn  | 0.1          | 98.28( $\pm$ 0.84) | 78.36( $\pm$ 13.74) | 1495( $\pm$ 692)               |
|          | 0.2          | 95.99( $\pm$ 1.31) | 77.83( $\pm$ 5.28)  | 1265( $\pm$ 635)               |
|          | 0.3          | 94.31( $\pm$ 1.93) | 80.99( $\pm$ 7.30)  | 2365( $\pm$ 1320)              |
|          | 0.4          | 94.36( $\pm$ 2.22) | 84.74( $\pm$ 6.96)  | 1585( $\pm$ 758)               |
| CDS      | 0.1          | 98.19( $\pm$ 1.22) | 76.52( $\pm$ 15.87) | 1275( $\pm$ 727)               |
|          | 0.2          | 96.28( $\pm$ 0.64) | 78.71( $\pm$ 1.32)  | 1295( $\pm$ 674)               |
|          | 0.3          | 95.03( $\pm$ 2.09) | 81.57( $\pm$ 7.14)  | 990( $\pm$ 619)                |
|          | 0.4          | 94.44( $\pm$ 1.44) | 84.45( $\pm$ 4.51)  | 900( $\pm$ 639)                |
| FCD      | 0.1          | 97.69( $\pm$ 1.04) | 75.42( $\pm$ 15.77) | 2430( $\pm$ 2289)              |
|          | 0.2          | 96.25( $\pm$ 1.14) | 78.74( $\pm$ 6.49)  | 1825( $\pm$ 1959)              |
|          | 0.3          | 94.68( $\pm$ 1.47) | 81.05( $\pm$ 5.12)  | 1375( $\pm$ 1316)              |
|          | 0.4          | 94.69( $\pm$ 1.31) | 85.79( $\pm$ 5.33)  | 1665( $\pm$ 1431)              |
| Fixed    | 0.1          | 97.97( $\pm$ 0.98) | 74.62( $\pm$ 13.68) | 1500( $\pm$ 0)                 |
|          | 0.2          | 96.14( $\pm$ 1.23) | 78.68( $\pm$ 5.76)  | 1500( $\pm$ 0)                 |
|          | 0.3          | 94.54( $\pm$ 1.32) | 80.36( $\pm$ 3.94)  | 1500( $\pm$ 0)                 |
|          | 0.4          | 94.27( $\pm$ 0.90) | 84.47( $\pm$ 3.48)  | 1500( $\pm$ 0)                 |
| Initial  | 0.1          | 97.95( $\pm$ 1.34) | 73.05( $\pm$ 17.99) | -1( $\pm$ 0)                   |
|          | 0.2          | 96.34( $\pm$ 1.24) | 77.53( $\pm$ 3.06)  | -1( $\pm$ 0)                   |
|          | 0.3          | 95.10( $\pm$ 1.90) | 81.44( $\pm$ 5.94)  | -1( $\pm$ 0)                   |
|          | 0.4          | 94.08( $\pm$ 2.32) | 83.08( $\pm$ 7.38)  | -1( $\pm$ 0)                   |

**Table S12:** The results of all iscx\_defacement-based datasets categorized by majority class counts.

| Method   | maj_class_count | maj_F1( $\pm$ CI)% | min_F1( $\pm$ CI)%  | Stopping Iteration( $\pm$ STD) |
|----------|-----------------|--------------------|---------------------|--------------------------------|
| CAS_real | 100             | 93.57( $\pm$ 2.39) | 68.27( $\pm$ 11.90) | 2040( $\pm$ 1798)              |
|          | 200             | 94.79( $\pm$ 1.68) | 76.46( $\pm$ 6.17)  | 1520( $\pm$ 1138)              |
|          | 500             | 96.79( $\pm$ 0.47) | 83.99( $\pm$ 3.52)  | 1955( $\pm$ 1699)              |
|          | 1000            | 97.86( $\pm$ 0.45) | 90.14( $\pm$ 1.26)  | 1635( $\pm$ 1676)              |
| CAS_syn  | 100             | 93.45( $\pm$ 2.72) | 70.26( $\pm$ 17.69) | 1620( $\pm$ 1071)              |
|          | 200             | 94.80( $\pm$ 1.58) | 77.35( $\pm$ 9.92)  | 1475( $\pm$ 580)               |
|          | 500             | 96.82( $\pm$ 0.75) | 84.05( $\pm$ 2.61)  | 1825( $\pm$ 1167)              |
|          | 1000            | 97.87( $\pm$ 0.25) | 90.26( $\pm$ 0.91)  | 1790( $\pm$ 995)               |
| CDS      | 100             | 94.22( $\pm$ 1.82) | 71.30( $\pm$ 14.93) | 1085( $\pm$ 691)               |
|          | 200             | 95.12( $\pm$ 1.66) | 76.74( $\pm$ 7.62)  | 1300( $\pm$ 685)               |
|          | 500             | 96.91( $\pm$ 0.52) | 84.47( $\pm$ 1.69)  | 1190( $\pm$ 750)               |
|          | 1000            | 97.71( $\pm$ 0.80) | 88.74( $\pm$ 4.31)  | 885( $\pm$ 542)                |
| FCD      | 100             | 94.29( $\pm$ 1.58) | 71.63( $\pm$ 14.92) | 1865( $\pm$ 1962)              |
|          | 200             | 94.48( $\pm$ 1.79) | 75.38( $\pm$ 8.81)  | 1890( $\pm$ 1674)              |
|          | 500             | 96.91( $\pm$ 0.16) | 84.84( $\pm$ 2.98)  | 1880( $\pm$ 2039)              |
|          | 1000            | 97.64( $\pm$ 0.66) | 89.15( $\pm$ 4.86)  | 1660( $\pm$ 1623)              |
| Fixed    | 100             | 93.93( $\pm$ 2.03) | 70.88( $\pm$ 16.99) | 1500( $\pm$ 0)                 |
|          | 200             | 94.28( $\pm$ 1.53) | 72.74( $\pm$ 8.08)  | 1500( $\pm$ 0)                 |
|          | 500             | 96.95( $\pm$ 0.75) | 85.07( $\pm$ 3.60)  | 1500( $\pm$ 0)                 |
|          | 1000            | 97.75( $\pm$ 0.28) | 89.44( $\pm$ 1.16)  | 1500( $\pm$ 0)                 |
| Initial  | 100             | 94.27( $\pm$ 3.91) | 68.79( $\pm$ 25.09) | -1( $\pm$ 0)                   |
|          | 200             | 94.85( $\pm$ 1.07) | 74.27( $\pm$ 5.66)  | -1( $\pm$ 0)                   |
|          | 500             | 96.62( $\pm$ 0.84) | 82.55( $\pm$ 2.82)  | -1( $\pm$ 0)                   |
|          | 1000            | 97.72( $\pm$ 0.45) | 89.48( $\pm$ 2.40)  | -1( $\pm$ 0)                   |

**Table S13:** The results of all fmnist17-based datasets categorized by imbalance ratios.

| Method   | min_maj_rate | maj_F1( $\pm$ CI)% | min_F1( $\pm$ CI)% | Stopping Iteration( $\pm$ STD) |
|----------|--------------|--------------------|--------------------|--------------------------------|
| CAS_real | 0.1          | 99.96( $\pm$ 0.39) | 99.63( $\pm$ 5.13) | 330( $\pm$ 371)                |
|          | 0.2          | 99.95( $\pm$ 0.64) | 99.75( $\pm$ 4.51) | 210( $\pm$ 165)                |
|          | 0.3          | 99.92( $\pm$ 0.07) | 99.75( $\pm$ 0.23) | 220( $\pm$ 190)                |
|          | 0.4          | 99.92( $\pm$ 0.25) | 99.81( $\pm$ 0.57) | 370( $\pm$ 449)                |
| CAS_syn  | 0.1          | 99.95( $\pm$ 0.52) | 99.51( $\pm$ 4.60) | 510( $\pm$ 485)                |
|          | 0.2          | 99.81( $\pm$ 0.60) | 99.13( $\pm$ 2.41) | 590( $\pm$ 610)                |
|          | 0.3          | 99.59( $\pm$ 1.06) | 98.63( $\pm$ 2.63) | 945( $\pm$ 577)                |
|          | 0.4          | 99.94( $\pm$ 0.40) | 99.84( $\pm$ 0.96) | 1105( $\pm$ 662)               |
| CDS      | 0.1          | 99.90( $\pm$ 0.10) | 98.92( $\pm$ 1.02) | 2345( $\pm$ 1183)              |
|          | 0.2          | 99.96( $\pm$ 0.08) | 99.81( $\pm$ 0.39) | 2720( $\pm$ 1357)              |
|          | 0.3          | 99.87( $\pm$ 0.71) | 99.59( $\pm$ 1.91) | 2370( $\pm$ 1152)              |
|          | 0.4          | 99.79( $\pm$ 1.07) | 99.48( $\pm$ 2.10) | 2215( $\pm$ 1269)              |
| FCD      | 0.1          | 99.51( $\pm$ 0.68) | 96.25( $\pm$ 4.54) | 2020( $\pm$ 835)               |
|          | 0.2          | 99.77( $\pm$ 0.41) | 98.97( $\pm$ 1.82) | 1870( $\pm$ 774)               |
|          | 0.3          | 99.37( $\pm$ 0.87) | 98.25( $\pm$ 2.35) | 1810( $\pm$ 930)               |
|          | 0.4          | 99.65( $\pm$ 0.59) | 99.13( $\pm$ 1.50) | 1960( $\pm$ 991)               |
| FID      | 0.1          | 99.87( $\pm$ 0.28) | 98.81( $\pm$ 3.00) | 3465( $\pm$ 1247)              |
|          | 0.2          | 99.82( $\pm$ 0.07) | 99.20( $\pm$ 0.34) | 3490( $\pm$ 1041)              |
|          | 0.3          | 99.94( $\pm$ 0.22) | 99.80( $\pm$ 0.71) | 3660( $\pm$ 1201)              |
|          | 0.4          | 99.80( $\pm$ 0.33) | 99.52( $\pm$ 0.77) | 3680( $\pm$ 2015)              |
| Fixed    | 0.1          | 99.54( $\pm$ 0.10) | 95.84( $\pm$ 0.99) | 9000( $\pm$ 0)                 |
|          | 0.2          | 99.43( $\pm$ 0.32) | 97.38( $\pm$ 1.36) | 9000( $\pm$ 0)                 |
|          | 0.3          | 99.44( $\pm$ 0.35) | 98.42( $\pm$ 1.20) | 9000( $\pm$ 0)                 |
|          | 0.4          | 99.77( $\pm$ 0.08) | 99.45( $\pm$ 0.19) | 9000( $\pm$ 0)                 |
| Initial  | 0.1          | 99.82( $\pm$ 0.10) | 97.68( $\pm$ 1.02) | -1( $\pm$ 0)                   |
|          | 0.2          | 99.72( $\pm$ 0.09) | 98.14( $\pm$ 0.43) | -1( $\pm$ 0)                   |
|          | 0.3          | 99.96( $\pm$ 0.14) | 99.88( $\pm$ 0.46) | -1( $\pm$ 0)                   |
|          | 0.4          | 99.82( $\pm$ 0.06) | 99.57( $\pm$ 0.16) | -1( $\pm$ 0)                   |
| Manual   | 0.1          | 99.96( $\pm$ 0.17) | 99.63( $\pm$ 1.49) | 7110( $\pm$ 1634)              |
|          | 0.2          | 99.94( $\pm$ 0.37) | 99.69( $\pm$ 1.62) | 6265( $\pm$ 1843)              |
|          | 0.3          | 99.70( $\pm$ 0.14) | 99.16( $\pm$ 0.43) | 6190( $\pm$ 1376)              |
|          | 0.4          | 99.34( $\pm$ 0.34) | 98.60( $\pm$ 0.79) | 6030( $\pm$ 1127)              |

**Table S14:** The results of all fmnist17-based datasets categorized by majority class counts.

| Method   | maj_class_count | maj_F1( $\pm$ CI)%  | min_F1( $\pm$ CI)%  | Stopping Iteration( $\pm$ STD) |
|----------|-----------------|---------------------|---------------------|--------------------------------|
| CAS_real | 100             | 100.00( $\pm$ 0.66) | 100.00( $\pm$ 5.67) | 185( $\pm$ 163)                |
|          | 200             | 100.00( $\pm$ 0.00) | 100.00( $\pm$ 0.00) | 240( $\pm$ 243)                |
|          | 500             | 99.82( $\pm$ 0.39)  | 99.22( $\pm$ 1.52)  | 310( $\pm$ 316)                |
|          | 1000            | 99.94( $\pm$ 0.09)  | 99.73( $\pm$ 0.52)  | 395( $\pm$ 460)                |
| CAS_syn  | 100             | 99.62( $\pm$ 2.27)  | 98.61( $\pm$ 10.76) | 585( $\pm$ 402)                |
|          | 200             | 99.94( $\pm$ 0.86)  | 99.80( $\pm$ 4.91)  | 745( $\pm$ 482)                |
|          | 500             | 99.82( $\pm$ 0.13)  | 99.22( $\pm$ 0.45)  | 900( $\pm$ 668)                |
|          | 1000            | 99.90( $\pm$ 0.06)  | 99.49( $\pm$ 0.44)  | 920( $\pm$ 845)                |
| CDS      | 100             | 99.87( $\pm$ 1.80)  | 99.71( $\pm$ 4.05)  | 2940( $\pm$ 939)               |
|          | 200             | 99.81( $\pm$ 0.17)  | 98.92( $\pm$ 0.45)  | 2995( $\pm$ 992)               |
|          | 500             | 99.90( $\pm$ 0.13)  | 99.47( $\pm$ 0.84)  | 2360( $\pm$ 1284)              |
|          | 1000            | 99.94( $\pm$ 0.06)  | 99.70( $\pm$ 0.44)  | 1355( $\pm$ 991)               |
| FCD      | 100             | 98.70( $\pm$ 1.29)  | 94.72( $\pm$ 5.53)  | 1060( $\pm$ 234)               |
|          | 200             | 99.75( $\pm$ 0.33)  | 98.64( $\pm$ 2.62)  | 1715( $\pm$ 381)               |
|          | 500             | 99.90( $\pm$ 0.17)  | 99.50( $\pm$ 0.98)  | 2515( $\pm$ 817)               |
|          | 1000            | 99.95( $\pm$ 0.06)  | 99.74( $\pm$ 0.44)  | 2370( $\pm$ 947)               |
| FID      | 100             | 99.74( $\pm$ 0.36)  | 99.15( $\pm$ 0.82)  | 2625( $\pm$ 1247)              |
|          | 200             | 99.87( $\pm$ 0.35)  | 99.29( $\pm$ 2.46)  | 2975( $\pm$ 565)               |
|          | 500             | 99.87( $\pm$ 0.17)  | 99.22( $\pm$ 0.99)  | 4185( $\pm$ 989)               |
|          | 1000            | 99.94( $\pm$ 0.09)  | 99.67( $\pm$ 0.52)  | 4510( $\pm$ 1639)              |
| Fixed    | 100             | 98.71( $\pm$ 0.43)  | 93.87( $\pm$ 1.63)  | 9000( $\pm$ 0)                 |
|          | 200             | 99.62( $\pm$ 0.18)  | 97.89( $\pm$ 0.56)  | 9000( $\pm$ 0)                 |
|          | 500             | 99.90( $\pm$ 0.18)  | 99.60( $\pm$ 0.88)  | 9000( $\pm$ 0)                 |
|          | 1000            | 99.95( $\pm$ 0.09)  | 99.74( $\pm$ 0.51)  | 9000( $\pm$ 0)                 |
| Initial  | 100             | 99.64( $\pm$ 0.00)  | 96.67( $\pm$ 0.00)  | -1( $\pm$ 0)                   |
|          | 200             | 100.00( $\pm$ 0.00) | 100.00( $\pm$ 0.00) | -1( $\pm$ 0)                   |
|          | 500             | 99.75( $\pm$ 0.18)  | 98.90( $\pm$ 0.88)  | -1( $\pm$ 0)                   |
|          | 1000            | 99.94( $\pm$ 0.13)  | 99.70( $\pm$ 0.66)  | -1( $\pm$ 0)                   |
| Manual   | 100             | 99.20( $\pm$ 0.44)  | 98.20( $\pm$ 1.55)  | 5205( $\pm$ 1123)              |
|          | 200             | 99.94( $\pm$ 0.22)  | 99.84( $\pm$ 1.49)  | 6980( $\pm$ 1105)              |
|          | 500             | 99.85( $\pm$ 0.16)  | 99.30( $\pm$ 0.99)  | 7410( $\pm$ 1261)              |
|          | 1000            | 99.95( $\pm$ 0.08)  | 99.74( $\pm$ 0.44)  | 6000( $\pm$ 1673)              |

**Table S15:** The results of all fmnist79-based datasets categorized by imbalance ratios.

| Method   | min_maj_rate | maj_F1( $\pm$ CI)% | min_F1( $\pm$ CI)%  | Stopping Iteration( $\pm$ STD) |
|----------|--------------|--------------------|---------------------|--------------------------------|
| CAS_real | 0.1          | 97.98( $\pm$ 1.13) | 80.03( $\pm$ 16.30) | 1390( $\pm$ 1000)              |
|          | 0.2          | 97.11( $\pm$ 1.38) | 85.84( $\pm$ 14.02) | 2160( $\pm$ 1458)              |
|          | 0.3          | 96.71( $\pm$ 0.76) | 89.82( $\pm$ 2.83)  | 2815( $\pm$ 1554)              |
|          | 0.4          | 96.91( $\pm$ 1.34) | 92.57( $\pm$ 3.55)  | 2475( $\pm$ 1714)              |
| CAS_syn  | 0.1          | 98.17( $\pm$ 1.47) | 80.25( $\pm$ 8.84)  | 930( $\pm$ 623)                |
|          | 0.2          | 97.64( $\pm$ 0.37) | 88.31( $\pm$ 2.76)  | 1210( $\pm$ 1042)              |
|          | 0.3          | 96.90( $\pm$ 0.81) | 90.02( $\pm$ 2.05)  | 1000( $\pm$ 687)               |
|          | 0.4          | 96.88( $\pm$ 0.90) | 92.47( $\pm$ 2.11)  | 1440( $\pm$ 792)               |
| CDS      | 0.1          | 98.14( $\pm$ 0.86) | 80.52( $\pm$ 7.10)  | 1760( $\pm$ 1296)              |
|          | 0.2          | 97.73( $\pm$ 0.72) | 88.37( $\pm$ 5.11)  | 2155( $\pm$ 853)               |
|          | 0.3          | 96.70( $\pm$ 0.39) | 89.24( $\pm$ 0.75)  | 1860( $\pm$ 770)               |
|          | 0.4          | 96.69( $\pm$ 0.77) | 92.03( $\pm$ 1.81)  | 2240( $\pm$ 1169)              |
| FCD      | 0.1          | 98.10( $\pm$ 0.71) | 81.74( $\pm$ 6.90)  | 2510( $\pm$ 1039)              |
|          | 0.2          | 97.27( $\pm$ 0.99) | 85.93( $\pm$ 6.51)  | 2305( $\pm$ 775)               |
|          | 0.3          | 97.00( $\pm$ 0.59) | 90.61( $\pm$ 1.58)  | 2150( $\pm$ 739)               |
|          | 0.4          | 97.14( $\pm$ 1.03) | 93.29( $\pm$ 2.39)  | 2135( $\pm$ 992)               |
| FID      | 0.1          | 98.20( $\pm$ 0.68) | 82.14( $\pm$ 7.41)  | 2285( $\pm$ 1057)              |
|          | 0.2          | 97.64( $\pm$ 0.98) | 88.74( $\pm$ 5.99)  | 2395( $\pm$ 855)               |
|          | 0.3          | 97.19( $\pm$ 0.75) | 90.88( $\pm$ 2.29)  | 2865( $\pm$ 984)               |
|          | 0.4          | 97.24( $\pm$ 0.89) | 93.48( $\pm$ 2.39)  | 3245( $\pm$ 1113)              |
| Fixed    | 0.1          | 97.13( $\pm$ 1.06) | 75.64( $\pm$ 10.38) | 9000( $\pm$ 0)                 |
|          | 0.2          | 97.53( $\pm$ 1.43) | 88.33( $\pm$ 7.95)  | 9000( $\pm$ 0)                 |
|          | 0.3          | 96.81( $\pm$ 1.10) | 89.97( $\pm$ 3.62)  | 9000( $\pm$ 0)                 |
|          | 0.4          | 97.19( $\pm$ 1.01) | 93.35( $\pm$ 2.84)  | 9000( $\pm$ 0)                 |
| Initial  | 0.1          | 97.76( $\pm$ 0.98) | 72.15( $\pm$ 9.40)  | -1( $\pm$ 0)                   |
|          | 0.2          | 97.48( $\pm$ 1.20) | 84.25( $\pm$ 6.70)  | -1( $\pm$ 0)                   |
|          | 0.3          | 96.74( $\pm$ 1.16) | 89.21( $\pm$ 3.43)  | -1( $\pm$ 0)                   |
|          | 0.4          | 97.18( $\pm$ 0.88) | 93.02( $\pm$ 2.26)  | -1( $\pm$ 0)                   |
| Manual   | 0.1          | 98.13( $\pm$ 0.93) | 80.60( $\pm$ 8.89)  | 6005( $\pm$ 2493)              |
|          | 0.2          | 97.43( $\pm$ 1.12) | 87.07( $\pm$ 5.31)  | 5005( $\pm$ 2113)              |
|          | 0.3          | 96.99( $\pm$ 0.88) | 90.43( $\pm$ 3.42)  | 4860( $\pm$ 1942)              |
|          | 0.4          | 96.97( $\pm$ 0.80) | 92.84( $\pm$ 2.00)  | 4050( $\pm$ 1353)              |

**Table S16:** The results of all fmnist24-based datasets categorized by imbalance ratios.

| Method   | maj_class_count | maj_F1( $\pm$ CI)% | min_F1( $\pm$ CI)%  | Stopping Iteration( $\pm$ STD) |
|----------|-----------------|--------------------|---------------------|--------------------------------|
| CAS_real | 0.1             | 94.43( $\pm$ 0.16) | 23.73( $\pm$ 4.66)  | 2590( $\pm$ 1217)              |
|          | 0.2             | 90.66( $\pm$ 0.52) | 38.99( $\pm$ 12.47) | 2630( $\pm$ 1320)              |
|          | 0.3             | 89.19( $\pm$ 0.70) | 58.20( $\pm$ 4.75)  | 2390( $\pm$ 1404)              |
|          | 0.4             | 87.33( $\pm$ 1.93) | 64.62( $\pm$ 20.56) | 2645( $\pm$ 1174)              |
| CAS_syn  | 0.1             | 94.57( $\pm$ 0.87) | 15.90( $\pm$ 4.57)  | 1370( $\pm$ 1090)              |
|          | 0.2             | 90.10( $\pm$ 1.50) | 46.14( $\pm$ 6.81)  | 1575( $\pm$ 1104)              |
|          | 0.3             | 89.09( $\pm$ 0.85) | 56.25( $\pm$ 6.02)  | 1645( $\pm$ 816)               |
|          | 0.4             | 87.00( $\pm$ 0.47) | 65.52( $\pm$ 8.09)  | 1780( $\pm$ 902)               |
| CDS      | 0.1             | 93.93( $\pm$ 0.67) | 24.65( $\pm$ 8.66)  | 2280( $\pm$ 1378)              |
|          | 0.2             | 90.41( $\pm$ 2.09) | 39.69( $\pm$ 11.77) | 1725( $\pm$ 951)               |
|          | 0.3             | 87.73( $\pm$ 0.75) | 57.42( $\pm$ 9.18)  | 2235( $\pm$ 1950)              |
|          | 0.4             | 86.79( $\pm$ 1.72) | 64.79( $\pm$ 5.59)  | 1820( $\pm$ 1614)              |
| FCD      | 0.1             | 94.14( $\pm$ 0.78) | 23.96( $\pm$ 2.88)  | 2420( $\pm$ 1376)              |
|          | 0.2             | 90.84( $\pm$ 1.77) | 39.88( $\pm$ 2.92)  | 2790( $\pm$ 1284)              |
|          | 0.3             | 88.96( $\pm$ 1.57) | 54.77( $\pm$ 9.03)  | 2885( $\pm$ 1638)              |
|          | 0.4             | 87.55( $\pm$ 1.33) | 66.11( $\pm$ 6.69)  | 2890( $\pm$ 1431)              |
| FID      | 0.1             | 94.56( $\pm$ 1.46) | 22.77( $\pm$ 8.61)  | 3100( $\pm$ 1237)              |
|          | 0.2             | 90.55( $\pm$ 2.38) | 42.79( $\pm$ 10.20) | 3725( $\pm$ 1389)              |
|          | 0.3             | 88.72( $\pm$ 1.30) | 55.73( $\pm$ 5.87)  | 3200( $\pm$ 1719)              |
|          | 0.4             | 87.25( $\pm$ 2.63) | 62.80( $\pm$ 8.13)  | 3675( $\pm$ 1632)              |
| Fixed    | 0.1             | 94.16( $\pm$ 0.62) | 22.14( $\pm$ 4.80)  | 9000( $\pm$ 0)                 |
|          | 0.2             | 91.05( $\pm$ 4.94) | 40.77( $\pm$ 15.95) | 9000( $\pm$ 0)                 |
|          | 0.3             | 88.02( $\pm$ 1.90) | 54.39( $\pm$ 11.05) | 9000( $\pm$ 0)                 |
|          | 0.4             | 86.45( $\pm$ 2.28) | 61.41( $\pm$ 5.78)  | 9000( $\pm$ 0)                 |
| Initial  | 0.1             | 95.27( $\pm$ 0.93) | 8.95( $\pm$ 11.59)  | -1( $\pm$ 0)                   |
|          | 0.2             | 91.76( $\pm$ 2.14) | 25.15( $\pm$ 9.49)  | -1( $\pm$ 0)                   |
|          | 0.3             | 89.13( $\pm$ 2.27) | 45.26( $\pm$ 11.69) | -1( $\pm$ 0)                   |
|          | 0.4             | 86.34( $\pm$ 2.19) | 50.79( $\pm$ 9.76)  | -1( $\pm$ 0)                   |
| Manual   | 0.1             | 94.49( $\pm$ 0.97) | 23.57( $\pm$ 8.20)  | 3870( $\pm$ 2223)              |
|          | 0.2             | 91.28( $\pm$ 1.33) | 43.32( $\pm$ 9.64)  | 4565( $\pm$ 1865)              |
|          | 0.3             | 88.83( $\pm$ 1.10) | 57.58( $\pm$ 5.06)  | 3735( $\pm$ 2021)              |
|          | 0.4             | 86.76( $\pm$ 2.14) | 62.87( $\pm$ 9.56)  | 3580( $\pm$ 1883)              |



**Table S17:** The results of all fmnist24-based datasets categorized by majority class counts.

| Method   | min_maj_rate | maj_F1( $\pm$ CI)% | min_F1( $\pm$ CI)%  | Stopping Iteration( $\pm$ STD) |
|----------|--------------|--------------------|---------------------|--------------------------------|
| CAS_real | 100          | 87.76( $\pm$ 1.48) | 29.22( $\pm$ 6.25)  | 1770( $\pm$ 759)               |
|          | 200          | 90.16( $\pm$ 0.79) | 42.15( $\pm$ 2.70)  | 2615( $\pm$ 946)               |
|          | 500          | 91.22( $\pm$ 1.85) | 54.07( $\pm$ 6.26)  | 3305( $\pm$ 1435)              |
|          | 1000         | 92.47( $\pm$ 0.39) | 60.10( $\pm$ 6.42)  | 2565( $\pm$ 1356)              |
| CAS_syn  | 100          | 86.12( $\pm$ 1.89) | 28.87( $\pm$ 13.32) | 1895( $\pm$ 1129)              |
|          | 200          | 90.16( $\pm$ 0.49) | 40.03( $\pm$ 7.53)  | 1790( $\pm$ 1302)              |
|          | 500          | 91.69( $\pm$ 1.17) | 52.69( $\pm$ 3.95)  | 1380( $\pm$ 683)               |
|          | 1000         | 92.78( $\pm$ 0.86) | 62.22( $\pm$ 4.96)  | 1305( $\pm$ 522)               |
| CDS      | 100          | 86.36( $\pm$ 3.72) | 28.84( $\pm$ 19.69) | 3060( $\pm$ 1920)              |
|          | 200          | 88.61( $\pm$ 1.92) | 40.16( $\pm$ 11.84) | 1925( $\pm$ 1461)              |
|          | 500          | 91.39( $\pm$ 1.20) | 54.90( $\pm$ 6.52)  | 1340( $\pm$ 983)               |
|          | 1000         | 92.50( $\pm$ 0.92) | 62.66( $\pm$ 7.12)  | 1735( $\pm$ 979)               |
| FCD      | 100          | 87.83( $\pm$ 2.58) | 26.77( $\pm$ 11.15) | 1335( $\pm$ 399)               |
|          | 200          | 89.81( $\pm$ 1.83) | 39.03( $\pm$ 12.88) | 2370( $\pm$ 562)               |
|          | 500          | 91.35( $\pm$ 1.71) | 57.79( $\pm$ 6.61)  | 3415( $\pm$ 1420)              |
|          | 1000         | 92.49( $\pm$ 0.45) | 61.13( $\pm$ 8.68)  | 3865( $\pm$ 1380)              |
| FID      | 100          | 87.14( $\pm$ 3.55) | 25.86( $\pm$ 15.07) | 3190( $\pm$ 1259)              |
|          | 200          | 90.16( $\pm$ 1.49) | 40.72( $\pm$ 5.73)  | 3550( $\pm$ 1217)              |
|          | 500          | 91.35( $\pm$ 1.44) | 54.44( $\pm$ 7.15)  | 3420( $\pm$ 1799)              |
|          | 1000         | 92.43( $\pm$ 0.56) | 63.07( $\pm$ 3.78)  | 3540( $\pm$ 1736)              |
| Fixed    | 100          | 86.14( $\pm$ 5.06) | 23.64( $\pm$ 19.07) | 9000( $\pm$ 0)                 |
|          | 200          | 89.58( $\pm$ 1.07) | 39.09( $\pm$ 7.69)  | 9000( $\pm$ 0)                 |
|          | 500          | 91.64( $\pm$ 1.51) | 56.99( $\pm$ 7.18)  | 9000( $\pm$ 0)                 |
|          | 1000         | 92.31( $\pm$ 0.51) | 59.00( $\pm$ 2.97)  | 9000( $\pm$ 0)                 |
| Initial  | 100          | 89.13( $\pm$ 3.38) | 11.00( $\pm$ 20.04) | -1( $\pm$ 0)                   |
|          | 200          | 90.03( $\pm$ 1.16) | 26.82( $\pm$ 8.36)  | -1( $\pm$ 0)                   |
|          | 500          | 90.55( $\pm$ 1.26) | 35.00( $\pm$ 5.90)  | -1( $\pm$ 0)                   |
|          | 1000         | 92.78( $\pm$ 0.53) | 57.32( $\pm$ 6.84)  | -1( $\pm$ 0)                   |
| Manual   | 100          | 86.82( $\pm$ 3.74) | 24.64( $\pm$ 22.95) | 2460( $\pm$ 795)               |
|          | 200          | 90.45( $\pm$ 1.32) | 43.70( $\pm$ 9.21)  | 4550( $\pm$ 1958)              |
|          | 500          | 91.61( $\pm$ 1.44) | 56.25( $\pm$ 6.63)  | 4250( $\pm$ 1565)              |
|          | 1000         | 92.49( $\pm$ 0.29) | 62.75( $\pm$ 2.68)  | 4490( $\pm$ 2571)              |

**Table S18:** The results of all fmnist79-based datasets categorized by majority class counts.

| Method   | maj_class_count | maj_F1( $\pm$ CI)% | min_F1( $\pm$ CI)%  | Stopping Iteration( $\pm$ STD) |
|----------|-----------------|--------------------|---------------------|--------------------------------|
| CAS_real | 100             | 96.44( $\pm$ 1.62) | 82.91( $\pm$ 15.94) | 1375( $\pm$ 545)               |
|          | 200             | 97.04( $\pm$ 1.77) | 85.96( $\pm$ 14.05) | 1665( $\pm$ 740)               |
|          | 500             | 97.39( $\pm$ 0.89) | 89.12( $\pm$ 6.08)  | 2690( $\pm$ 1544)              |
|          | 1000            | 97.84( $\pm$ 0.56) | 90.28( $\pm$ 2.84)  | 3110( $\pm$ 2069)              |
| CAS_syn  | 100             | 96.74( $\pm$ 2.30) | 83.60( $\pm$ 9.51)  | 1050( $\pm$ 540)               |
|          | 200             | 97.29( $\pm$ 1.24) | 88.13( $\pm$ 6.08)  | 1230( $\pm$ 797)               |
|          | 500             | 97.58( $\pm$ 1.01) | 88.85( $\pm$ 5.64)  | 1255( $\pm$ 802)               |
|          | 1000            | 97.98( $\pm$ 0.22) | 90.47( $\pm$ 1.78)  | 1045( $\pm$ 1063)              |
| CDS      | 100             | 96.35( $\pm$ 1.33) | 83.33( $\pm$ 7.74)  | 2095( $\pm$ 772)               |
|          | 200             | 97.23( $\pm$ 0.99) | 86.59( $\pm$ 5.03)  | 2325( $\pm$ 865)               |
|          | 500             | 97.79( $\pm$ 0.87) | 89.94( $\pm$ 5.04)  | 2240( $\pm$ 1337)              |
|          | 1000            | 97.90( $\pm$ 0.49) | 90.31( $\pm$ 2.75)  | 1355( $\pm$ 884)               |
| FCD      | 100             | 96.83( $\pm$ 1.23) | 84.24( $\pm$ 9.61)  | 1610( $\pm$ 496)               |
|          | 200             | 97.02( $\pm$ 1.22) | 87.59( $\pm$ 5.04)  | 2145( $\pm$ 487)               |
|          | 500             | 97.72( $\pm$ 1.21) | 89.48( $\pm$ 6.63)  | 2850( $\pm$ 928)               |
|          | 1000            | 97.96( $\pm$ 0.29) | 90.27( $\pm$ 2.24)  | 2495( $\pm$ 1040)              |
| FID      | 100             | 96.95( $\pm$ 1.50) | 85.22( $\pm$ 7.91)  | 2915( $\pm$ 1236)              |
|          | 200             | 97.60( $\pm$ 1.36) | 89.86( $\pm$ 7.82)  | 2505( $\pm$ 848)               |
|          | 500             | 97.72( $\pm$ 1.15) | 89.44( $\pm$ 5.41)  | 2795( $\pm$ 1185)              |
|          | 1000            | 98.00( $\pm$ 0.30) | 90.72( $\pm$ 1.97)  | 2575( $\pm$ 954)               |
| Fixed    | 100             | 96.27( $\pm$ 1.39) | 83.32( $\pm$ 8.27)  | 9000( $\pm$ 0)                 |
|          | 200             | 96.83( $\pm$ 1.20) | 84.90( $\pm$ 5.36)  | 9000( $\pm$ 0)                 |
|          | 500             | 97.55( $\pm$ 1.24) | 88.74( $\pm$ 7.50)  | 9000( $\pm$ 0)                 |
|          | 1000            | 98.02( $\pm$ 0.28) | 90.33( $\pm$ 2.12)  | 9000( $\pm$ 0)                 |
| Initial  | 100             | 96.54( $\pm$ 1.46) | 76.13( $\pm$ 7.68)  | -1( $\pm$ 0)                   |
|          | 200             | 97.21( $\pm$ 1.24) | 84.08( $\pm$ 3.92)  | -1( $\pm$ 0)                   |
|          | 500             | 97.50( $\pm$ 1.25) | 88.19( $\pm$ 6.51)  | -1( $\pm$ 0)                   |
|          | 1000            | 97.91( $\pm$ 0.25) | 90.23( $\pm$ 1.82)  | -1( $\pm$ 0)                   |
| Manual   | 100             | 96.81( $\pm$ 1.48) | 84.27( $\pm$ 10.10) | 2505( $\pm$ 766)               |
|          | 200             | 97.28( $\pm$ 1.29) | 87.96( $\pm$ 5.13)  | 4355( $\pm$ 816)               |
|          | 500             | 97.54( $\pm$ 0.93) | 88.57( $\pm$ 5.84)  | 6260( $\pm$ 1531)              |
|          | 1000            | 97.88( $\pm$ 0.56) | 90.13( $\pm$ 3.25)  | 6800( $\pm$ 1629)              |

**Table S19:** The results of all cifar17-based datasets categorized by imbalance ratios.

| Method   | min_maj_rate | maj_F1( $\pm$ CI)% | min_F1( $\pm$ CI)% | Stopping Iteration( $\pm$ STD) |
|----------|--------------|--------------------|--------------------|--------------------------------|
| CAS_real | 0.1          | 93.08( $\pm$ 1.86) | 43.17( $\pm$ 9.61) | 13950( $\pm$ 7796)             |
|          | 0.2          | 89.75( $\pm$ 1.31) | 56.29( $\pm$ 6.92) | 14400( $\pm$ 3662)             |
|          | 0.3          | 90.36( $\pm$ 0.92) | 67.19( $\pm$ 3.17) | 15700( $\pm$ 6333)             |
|          | 0.4          | 86.52( $\pm$ 4.28) | 68.89( $\pm$ 5.07) | 17650( $\pm$ 8773)             |
| CAS_syn  | 0.1          | 94.18( $\pm$ 2.09) | 42.04( $\pm$ 9.03) | 10750( $\pm$ 7468)             |
|          | 0.2          | 90.15( $\pm$ 1.31) | 54.72( $\pm$ 7.38) | 10700( $\pm$ 8873)             |
|          | 0.3          | 88.50( $\pm$ 2.40) | 66.79( $\pm$ 4.02) | 18950( $\pm$ 11623)            |
|          | 0.4          | 87.81( $\pm$ 2.35) | 68.42( $\pm$ 5.76) | 18050( $\pm$ 10308)            |
| CDS      | 0.1          | 93.96( $\pm$ 2.87) | 46.11( $\pm$ 4.29) | 14350( $\pm$ 10534)            |
|          | 0.2          | 90.96( $\pm$ 1.37) | 58.18( $\pm$ 4.39) | 17950( $\pm$ 12546)            |
|          | 0.3          | 88.91( $\pm$ 2.22) | 65.68( $\pm$ 1.87) | 21400( $\pm$ 14039)            |
|          | 0.4          | 86.80( $\pm$ 3.00) | 68.51( $\pm$ 6.91) | 20700( $\pm$ 12545)            |
| FCD      | 0.1          | 92.00( $\pm$ 1.17) | 41.90( $\pm$ 5.45) | 8000( $\pm$ 4154)              |
|          | 0.2          | 91.05( $\pm$ 1.09) | 57.00( $\pm$ 3.34) | 8900( $\pm$ 3596)              |
|          | 0.3          | 88.53( $\pm$ 2.77) | 63.98( $\pm$ 6.82) | 8150( $\pm$ 2906)              |
|          | 0.4          | 87.91( $\pm$ 1.31) | 69.79( $\pm$ 2.85) | 8450( $\pm$ 4006)              |
| FID      | 0.1          | 94.07( $\pm$ 0.90) | 41.97( $\pm$ 6.94) | 12150( $\pm$ 10132)            |
|          | 0.2          | 90.88( $\pm$ 1.37) | 55.24( $\pm$ 4.11) | 7300( $\pm$ 3357)              |
|          | 0.3          | 89.75( $\pm$ 2.95) | 66.86( $\pm$ 5.62) | 6100( $\pm$ 2633)              |
|          | 0.4          | 87.18( $\pm$ 1.92) | 67.40( $\pm$ 7.10) | 7650( $\pm$ 3990)              |
| Fixed    | 0.1          | 92.90( $\pm$ 2.31) | 38.57( $\pm$ 5.86) | 20000( $\pm$ 0)                |
|          | 0.2          | 89.82( $\pm$ 4.69) | 54.81( $\pm$ 3.75) | 20000( $\pm$ 0)                |
|          | 0.3          | 88.96( $\pm$ 2.37) | 65.61( $\pm$ 5.95) | 20000( $\pm$ 0)                |
|          | 0.4          | 86.60( $\pm$ 1.95) | 69.11( $\pm$ 5.57) | 20000( $\pm$ 0)                |
| IS       | 0.1          | 92.69( $\pm$ 1.07) | 40.37( $\pm$ 7.24) | 18650( $\pm$ 16030)            |
|          | 0.2          | 90.81( $\pm$ 0.83) | 58.04( $\pm$ 5.30) | 14150( $\pm$ 13235)            |
|          | 0.3          | 89.45( $\pm$ 0.54) | 67.04( $\pm$ 2.11) | 17850( $\pm$ 15725)            |
|          | 0.4          | 85.79( $\pm$ 1.93) | 67.39( $\pm$ 5.28) | 15200( $\pm$ 16080)            |
| Initial  | 0.1          | 93.21( $\pm$ 3.12) | 37.60( $\pm$ 6.10) | -1( $\pm$ 0)                   |
|          | 0.2          | 91.70( $\pm$ 3.24) | 55.27( $\pm$ 8.48) | -1( $\pm$ 0)                   |
|          | 0.3          | 89.27( $\pm$ 2.69) | 63.96( $\pm$ 4.56) | -1( $\pm$ 0)                   |
|          | 0.4          | 85.16( $\pm$ 2.25) | 66.60( $\pm$ 5.42) | -1( $\pm$ 0)                   |

**Table S20:** The results of all cifar17-based datasets categorized by majority class counts.

| Method   | maj_class_count | maj_F1( $\pm$ CI)% | min_F1( $\pm$ CI)%  | Stopping Iteration( $\pm$ STD) |
|----------|-----------------|--------------------|---------------------|--------------------------------|
| CAS_real | 100             | 86.31( $\pm$ 4.68) | 52.61( $\pm$ 9.76)  | 11600( $\pm$ 7680)             |
|          | 200             | 90.75( $\pm$ 1.77) | 57.97( $\pm$ 5.60)  | 14850( $\pm$ 5922)             |
|          | 500             | 91.35( $\pm$ 0.95) | 61.97( $\pm$ 4.52)  | 14450( $\pm$ 4477)             |
|          | 1000            | 91.30( $\pm$ 0.98) | 63.01( $\pm$ 4.57)  | 20800( $\pm$ 6220)             |
| CAS_syn  | 100             | 88.16( $\pm$ 3.33) | 49.93( $\pm$ 4.00)  | 13150( $\pm$ 9609)             |
|          | 200             | 89.48( $\pm$ 1.87) | 57.37( $\pm$ 5.66)  | 19500( $\pm$ 9052)             |
|          | 500             | 91.17( $\pm$ 1.10) | 61.45( $\pm$ 5.01)  | 15300( $\pm$ 12376)            |
|          | 1000            | 91.83( $\pm$ 0.59) | 63.22( $\pm$ 2.31)  | 10500( $\pm$ 8172)             |
| CDS      | 100             | 87.01( $\pm$ 2.93) | 49.54( $\pm$ 9.16)  | 21400( $\pm$ 9593)             |
|          | 200             | 90.10( $\pm$ 2.09) | 60.59( $\pm$ 9.66)  | 27950( $\pm$ 12538)            |
|          | 500             | 91.16( $\pm$ 1.37) | 61.41( $\pm$ 3.40)  | 15600( $\pm$ 12832)            |
|          | 1000            | 92.35( $\pm$ 1.04) | 66.94( $\pm$ 5.56)  | 9450( $\pm$ 6589)              |
| FCD      | 100             | 85.31( $\pm$ 3.21) | 43.85( $\pm$ 9.34)  | 5100( $\pm$ 3354)              |
|          | 200             | 90.15( $\pm$ 1.11) | 59.47( $\pm$ 8.45)  | 6550( $\pm$ 1394)              |
|          | 500             | 91.69( $\pm$ 1.66) | 64.03( $\pm$ 3.95)  | 9050( $\pm$ 1356)              |
|          | 1000            | 92.34( $\pm$ 0.81) | 65.32( $\pm$ 4.38)  | 12800( $\pm$ 2067)             |
| FID      | 100             | 89.12( $\pm$ 2.88) | 49.13( $\pm$ 8.32)  | 7100( $\pm$ 8220)              |
|          | 200             | 89.69( $\pm$ 2.87) | 55.74( $\pm$ 6.77)  | 9000( $\pm$ 8620)              |
|          | 500             | 91.35( $\pm$ 0.89) | 62.26( $\pm$ 6.12)  | 7300( $\pm$ 1719)              |
|          | 1000            | 91.71( $\pm$ 1.46) | 64.34( $\pm$ 5.82)  | 9800( $\pm$ 2948)              |
| Fixed    | 100             | 85.50( $\pm$ 4.73) | 49.04( $\pm$ 5.47)  | 20000( $\pm$ 0)                |
|          | 200             | 90.49( $\pm$ 1.08) | 58.94( $\pm$ 5.94)  | 20000( $\pm$ 0)                |
|          | 500             | 91.04( $\pm$ 0.59) | 58.12( $\pm$ 3.33)  | 20000( $\pm$ 0)                |
|          | 1000            | 91.26( $\pm$ 0.75) | 62.00( $\pm$ 2.64)  | 20000( $\pm$ 0)                |
| IS       | 100             | 86.76( $\pm$ 2.56) | 51.15( $\pm$ 11.83) | 33650( $\pm$ 7435)             |
|          | 200             | 88.96( $\pm$ 1.74) | 57.21( $\pm$ 6.38)  | 19100( $\pm$ 16923)            |
|          | 500             | 90.79( $\pm$ 1.44) | 60.32( $\pm$ 4.70)  | 5150( $\pm$ 4475)              |
|          | 1000            | 92.21( $\pm$ 0.46) | 64.16( $\pm$ 3.68)  | 7950( $\pm$ 7836)              |
| Initial  | 100             | 86.20( $\pm$ 4.72) | 41.62( $\pm$ 5.94)  | -1( $\pm$ 0)                   |
|          | 200             | 89.84( $\pm$ 3.27) | 57.75( $\pm$ 7.26)  | -1( $\pm$ 0)                   |
|          | 500             | 91.54( $\pm$ 1.73) | 60.83( $\pm$ 4.31)  | -1( $\pm$ 0)                   |
|          | 1000            | 91.76( $\pm$ 0.89) | 63.23( $\pm$ 4.87)  | -1( $\pm$ 0)                   |

**Table S21:** The results of all mnist01-based datasets categorized by imbalance ratios.

| Method   | min_maj_rate | maj_F1( $\pm$ CI)%  | min_F1( $\pm$ CI)%  | Stopping Iteration( $\pm$ STD) |
|----------|--------------|---------------------|---------------------|--------------------------------|
| CAS_real | 0.1          | 99.20( $\pm$ 1.08)  | 93.39( $\pm$ 24.34) | 900( $\pm$ 825)                |
|          | 0.2          | 99.41( $\pm$ 0.50)  | 97.20( $\pm$ 2.71)  | 920( $\pm$ 725)                |
|          | 0.3          | 99.41( $\pm$ 1.75)  | 98.09( $\pm$ 12.71) | 1340( $\pm$ 995)               |
|          | 0.4          | 99.22( $\pm$ 2.57)  | 98.11( $\pm$ 14.63) | 1565( $\pm$ 1188)              |
| CAS_syn  | 0.1          | 99.49( $\pm$ 0.97)  | 94.66( $\pm$ 6.65)  | 800( $\pm$ 773)                |
|          | 0.2          | 99.48( $\pm$ 13.64) | 97.33( $\pm$ 9.76)  | 1225( $\pm$ 741)               |
|          | 0.3          | 99.01( $\pm$ 0.83)  | 96.73( $\pm$ 3.25)  | 1220( $\pm$ 780)               |
|          | 0.4          | 99.23( $\pm$ 1.01)  | 98.13( $\pm$ 3.30)  | 1145( $\pm$ 505)               |
| CDS      | 0.1          | 99.60( $\pm$ 0.55)  | 96.21( $\pm$ 4.41)  | 2205( $\pm$ 1444)              |
|          | 0.2          | 99.67( $\pm$ 1.37)  | 98.39( $\pm$ 3.85)  | 2345( $\pm$ 1487)              |
|          | 0.3          | 99.50( $\pm$ 1.50)  | 98.36( $\pm$ 4.19)  | 2050( $\pm$ 978)               |
|          | 0.4          | 99.17( $\pm$ 1.28)  | 97.98( $\pm$ 4.57)  | 2705( $\pm$ 1587)              |
| FCD      | 0.1          | 99.31( $\pm$ 0.55)  | 94.11( $\pm$ 4.73)  | 1320( $\pm$ 572)               |
|          | 0.2          | 99.00( $\pm$ 0.24)  | 96.02( $\pm$ 1.16)  | 1790( $\pm$ 973)               |
|          | 0.3          | 98.79( $\pm$ 0.47)  | 96.36( $\pm$ 1.51)  | 1830( $\pm$ 932)               |
|          | 0.4          | 99.03( $\pm$ 0.49)  | 97.08( $\pm$ 0.96)  | 1955( $\pm$ 1160)              |
| FID      | 0.1          | 99.58( $\pm$ 0.42)  | 94.97( $\pm$ 4.55)  | 2930( $\pm$ 1269)              |
|          | 0.2          | 99.20( $\pm$ 0.52)  | 96.03( $\pm$ 2.73)  | 3090( $\pm$ 615)               |
|          | 0.3          | 99.62( $\pm$ 0.61)  | 98.77( $\pm$ 1.86)  | 2975( $\pm$ 1130)              |
|          | 0.4          | 99.01( $\pm$ 0.55)  | 97.51( $\pm$ 1.31)  | 2955( $\pm$ 783)               |
| Fixed    | 0.1          | 99.16( $\pm$ 0.92)  | 93.61( $\pm$ 6.86)  | 5000( $\pm$ 0)                 |
|          | 0.2          | 94.14( $\pm$ 0.58)  | 92.87( $\pm$ 2.58)  | 5000( $\pm$ 0)                 |
|          | 0.3          | 99.16( $\pm$ 0.44)  | 97.04( $\pm$ 1.34)  | 5000( $\pm$ 0)                 |
|          | 0.4          | 98.88( $\pm$ 0.47)  | 96.99( $\pm$ 1.11)  | 5000( $\pm$ 0)                 |
| Initial  | 0.1          | 98.52( $\pm$ 0.40)  | 72.95( $\pm$ 5.41)  | -1( $\pm$ 0)                   |
|          | 0.2          | 99.41( $\pm$ 0.66)  | 96.99( $\pm$ 3.25)  | -1( $\pm$ 0)                   |
|          | 0.3          | 98.19( $\pm$ 0.21)  | 90.38( $\pm$ 0.69)  | -1( $\pm$ 0)                   |
|          | 0.4          | 98.60( $\pm$ 0.60)  | 93.59( $\pm$ 1.72)  | -1( $\pm$ 0)                   |

**Table S22:** The results of all mnist01-based datasets categorized by majority class counts.

| Method   | maj_class_count | maj_F1( $\pm$ CI)%  | min_F1( $\pm$ CI)%  | Stopping Iteration( $\pm$ STD) |
|----------|-----------------|---------------------|---------------------|--------------------------------|
| CAS_real | 100             | 98.97( $\pm$ 2.43)  | 95.10( $\pm$ 26.67) | 375( $\pm$ 352)                |
|          | 200             | 98.93( $\pm$ 0.91)  | 94.68( $\pm$ 14.41) | 920( $\pm$ 605)                |
|          | 500             | 99.55( $\pm$ 0.33)  | 98.02( $\pm$ 2.27)  | 1735( $\pm$ 1071)              |
|          | 1000            | 99.79( $\pm$ 2.24)  | 98.99( $\pm$ 13.54) | 1695( $\pm$ 974)               |
| CAS_syn  | 100             | 98.88( $\pm$ 2.03)  | 94.40( $\pm$ 8.10)  | 1070( $\pm$ 803)               |
|          | 200             | 98.93( $\pm$ 0.73)  | 95.53( $\pm$ 3.24)  | 865( $\pm$ 639)                |
|          | 500             | 99.60( $\pm$ 0.23)  | 97.86( $\pm$ 1.11)  | 1375( $\pm$ 711)               |
|          | 1000            | 99.80( $\pm$ 13.92) | 99.05( $\pm$ 10.26) | 1080( $\pm$ 664)               |
| CDS      | 100             | 99.11( $\pm$ 2.28)  | 97.10( $\pm$ 7.96)  | 2815( $\pm$ 1851)              |
|          | 200             | 99.44( $\pm$ 0.59)  | 97.03( $\pm$ 3.19)  | 2485( $\pm$ 1301)              |
|          | 500             | 99.60( $\pm$ 0.57)  | 97.90( $\pm$ 3.09)  | 1945( $\pm$ 1131)              |
|          | 1000            | 99.79( $\pm$ 0.09)  | 98.91( $\pm$ 0.45)  | 2060( $\pm$ 1057)              |
| FCD      | 100             | 97.95( $\pm$ 0.93)  | 92.54( $\pm$ 3.70)  | 790( $\pm$ 386)                |
|          | 200             | 98.94( $\pm$ 0.18)  | 95.25( $\pm$ 1.78)  | 1590( $\pm$ 569)               |
|          | 500             | 99.42( $\pm$ 0.34)  | 96.71( $\pm$ 1.08)  | 1995( $\pm$ 608)               |
|          | 1000            | 99.82( $\pm$ 0.12)  | 99.07( $\pm$ 0.58)  | 2520( $\pm$ 1101)              |
| FID      | 100             | 99.13( $\pm$ 1.02)  | 95.76( $\pm$ 7.12)  | 2720( $\pm$ 968)               |
|          | 200             | 98.81( $\pm$ 0.77)  | 94.24( $\pm$ 3.01)  | 3510( $\pm$ 1129)              |
|          | 500             | 99.65( $\pm$ 0.35)  | 98.16( $\pm$ 1.89)  | 2660( $\pm$ 876)               |
|          | 1000            | 99.82( $\pm$ 0.07)  | 99.12( $\pm$ 0.26)  | 3060( $\pm$ 657)               |
| Fixed    | 100             | 98.22( $\pm$ 1.47)  | 92.56( $\pm$ 7.51)  | 5000( $\pm$ 0)                 |
|          | 200             | 98.74( $\pm$ 0.45)  | 94.62( $\pm$ 4.59)  | 5000( $\pm$ 0)                 |
|          | 500             | 99.57( $\pm$ 0.24)  | 97.91( $\pm$ 1.32)  | 5000( $\pm$ 0)                 |
|          | 1000            | 94.80( $\pm$ 0.09)  | 95.41( $\pm$ 0.18)  | 5000( $\pm$ 0)                 |
| Initial  | 100             | 98.16( $\pm$ 0.69)  | 81.83( $\pm$ 4.38)  | -1( $\pm$ 0)                   |
|          | 200             | 98.23( $\pm$ 0.33)  | 81.69( $\pm$ 4.56)  | -1( $\pm$ 0)                   |
|          | 500             | 99.48( $\pm$ 0.43)  | 97.19( $\pm$ 2.07)  | -1( $\pm$ 0)                   |
|          | 1000            | 98.87( $\pm$ 0.07)  | 93.20( $\pm$ 0.27)  | -1( $\pm$ 0)                   |

**Table S23:** The results of all mnist23-based datasets categorized by imbalance ratios.

| Method   | min_maj_rate | maj_F1( $\pm$ CI)% | min_F1( $\pm$ CI)%  | Stopping Iteration( $\pm$ STD) |
|----------|--------------|--------------------|---------------------|--------------------------------|
| CAS_real | 0.1          | 97.85( $\pm$ 1.03) | 73.43( $\pm$ 24.90) | 1675( $\pm$ 1101)              |
|          | 0.2          | 98.00( $\pm$ 2.76) | 87.89( $\pm$ 35.31) | 1855( $\pm$ 1778)              |
|          | 0.3          | 96.66( $\pm$ 2.54) | 87.61( $\pm$ 23.63) | 2240( $\pm$ 1561)              |
|          | 0.4          | 96.40( $\pm$ 2.36) | 87.62( $\pm$ 13.82) | 2375( $\pm$ 1831)              |
| CAS_syn  | 0.1          | 98.59( $\pm$ 1.06) | 82.92( $\pm$ 16.16) | 725( $\pm$ 716)                |
|          | 0.2          | 97.67( $\pm$ 0.48) | 88.54( $\pm$ 2.40)  | 1020( $\pm$ 620)               |
|          | 0.3          | 97.25( $\pm$ 0.80) | 90.13( $\pm$ 3.53)  | 1280( $\pm$ 946)               |
|          | 0.4          | 96.82( $\pm$ 2.25) | 91.91( $\pm$ 6.97)  | 1905( $\pm$ 1506)              |
| CDS      | 0.1          | 98.74( $\pm$ 0.77) | 85.65( $\pm$ 13.55) | 1760( $\pm$ 1112)              |
|          | 0.2          | 97.56( $\pm$ 1.23) | 86.82( $\pm$ 13.12) | 2355( $\pm$ 1160)              |
|          | 0.3          | 96.57( $\pm$ 0.35) | 86.39( $\pm$ 1.87)  | 3215( $\pm$ 1231)              |
|          | 0.4          | 95.96( $\pm$ 1.06) | 85.78( $\pm$ 3.25)  | 1765( $\pm$ 1079)              |
| FCD      | 0.1          | 98.56( $\pm$ 0.61) | 81.02( $\pm$ 7.42)  | 2055( $\pm$ 1144)              |
|          | 0.2          | 97.56( $\pm$ 1.66) | 84.66( $\pm$ 8.87)  | 2265( $\pm$ 1370)              |
|          | 0.3          | 97.16( $\pm$ 0.81) | 89.42( $\pm$ 4.88)  | 2535( $\pm$ 2104)              |
|          | 0.4          | 96.40( $\pm$ 1.52) | 90.99( $\pm$ 10.61) | 2465( $\pm$ 1600)              |
| FID      | 0.1          | 98.51( $\pm$ 0.68) | 81.18( $\pm$ 9.62)  | 3315( $\pm$ 1422)              |
|          | 0.2          | 97.87( $\pm$ 1.08) | 89.04( $\pm$ 3.96)  | 3690( $\pm$ 1539)              |
|          | 0.3          | 97.12( $\pm$ 0.42) | 89.20( $\pm$ 1.29)  | 4280( $\pm$ 1735)              |
|          | 0.4          | 96.54( $\pm$ 1.01) | 90.80( $\pm$ 2.70)  | 3995( $\pm$ 1509)              |
| Fixed    | 0.1          | 98.48( $\pm$ 1.02) | 81.79( $\pm$ 13.05) | 5000( $\pm$ 0)                 |
|          | 0.2          | 98.20( $\pm$ 0.54) | 90.23( $\pm$ 5.45)  | 5000( $\pm$ 0)                 |
|          | 0.3          | 97.18( $\pm$ 0.41) | 89.87( $\pm$ 3.87)  | 5000( $\pm$ 0)                 |
|          | 0.4          | 95.67( $\pm$ 2.07) | 89.11( $\pm$ 12.47) | 5000( $\pm$ 0)                 |
| Initial  | 0.1          | 97.37( $\pm$ 1.09) | 52.21( $\pm$ 18.32) | -1( $\pm$ 0)                   |
|          | 0.2          | 96.38( $\pm$ 0.84) | 69.94( $\pm$ 3.89)  | -1( $\pm$ 0)                   |
|          | 0.3          | 96.08( $\pm$ 1.08) | 80.33( $\pm$ 5.35)  | -1( $\pm$ 0)                   |
|          | 0.4          | 96.34( $\pm$ 1.15) | 87.70( $\pm$ 3.65)  | -1( $\pm$ 0)                   |

**Table S24:** The results of all mnist23-based datasets categorized by majority class counts.

| Method   | maj_class_count | maj_F1( $\pm$ CI)% | min_F1( $\pm$ CI)%  | Stopping Iteration( $\pm$ STD) |
|----------|-----------------|--------------------|---------------------|--------------------------------|
| CAS_real | 100             | 95.64( $\pm$ 1.77) | 70.05( $\pm$ 20.61) | 845( $\pm$ 357)                |
|          | 200             | 96.99( $\pm$ 1.14) | 83.79( $\pm$ 11.83) | 1495( $\pm$ 778)               |
|          | 500             | 98.08( $\pm$ 1.68) | 90.65( $\pm$ 15.05) | 3080( $\pm$ 1295)              |
|          | 1000            | 98.20( $\pm$ 1.74) | 92.04( $\pm$ 17.40) | 2725( $\pm$ 2155)              |
| CAS_syn  | 100             | 96.64( $\pm$ 2.31) | 84.39( $\pm$ 12.97) | 1010( $\pm$ 532)               |
|          | 200             | 97.40( $\pm$ 0.90) | 86.16( $\pm$ 3.06)  | 1005( $\pm$ 549)               |
|          | 500             | 98.21( $\pm$ 1.09) | 91.60( $\pm$ 4.48)  | 1425( $\pm$ 1075)              |
|          | 1000            | 98.10( $\pm$ 0.19) | 91.35( $\pm$ 1.41)  | 1490( $\pm$ 1704)              |
| CDS      | 100             | 96.10( $\pm$ 1.29) | 79.21( $\pm$ 15.06) | 2590( $\pm$ 1477)              |
|          | 200             | 96.49( $\pm$ 0.75) | 82.65( $\pm$ 11.57) | 2235( $\pm$ 1164)              |
|          | 500             | 98.13( $\pm$ 1.51) | 90.98( $\pm$ 7.51)  | 2305( $\pm$ 1371)              |
|          | 1000            | 98.12( $\pm$ 0.31) | 91.79( $\pm$ 1.83)  | 1965( $\pm$ 1062)              |
| FCD      | 100             | 96.32( $\pm$ 1.07) | 78.45( $\pm$ 7.83)  | 875( $\pm$ 273)                |
|          | 200             | 97.50( $\pm$ 2.16) | 86.49( $\pm$ 13.58) | 1375( $\pm$ 387)               |
|          | 500             | 97.62( $\pm$ 1.23) | 88.98( $\pm$ 7.54)  | 2930( $\pm$ 589)               |
|          | 1000            | 98.25( $\pm$ 0.12) | 92.17( $\pm$ 1.43)  | 4140( $\pm$ 1654)              |
| FID      | 100             | 96.10( $\pm$ 1.27) | 78.49( $\pm$ 7.15)  | 3705( $\pm$ 1048)              |
|          | 200             | 97.84( $\pm$ 0.72) | 89.76( $\pm$ 6.06)  | 5365( $\pm$ 1401)              |
|          | 500             | 97.95( $\pm$ 1.02) | 90.39( $\pm$ 5.70)  | 2285( $\pm$ 868)               |
|          | 1000            | 98.15( $\pm$ 0.26) | 91.57( $\pm$ 1.54)  | 3925( $\pm$ 1179)              |
| Fixed    | 100             | 95.70( $\pm$ 1.09) | 78.45( $\pm$ 13.06) | 5000( $\pm$ 0)                 |
|          | 200             | 97.49( $\pm$ 1.81) | 89.17( $\pm$ 13.24) | 5000( $\pm$ 0)                 |
|          | 500             | 98.08( $\pm$ 1.35) | 91.29( $\pm$ 7.28)  | 5000( $\pm$ 0)                 |
|          | 1000            | 98.26( $\pm$ 0.36) | 92.09( $\pm$ 2.16)  | 5000( $\pm$ 0)                 |
| Initial  | 100             | 95.46( $\pm$ 1.33) | 61.27( $\pm$ 14.74) | -1( $\pm$ 0)                   |
|          | 200             | 95.83( $\pm$ 0.85) | 66.24( $\pm$ 4.83)  | -1( $\pm$ 0)                   |
|          | 500             | 97.66( $\pm$ 1.24) | 84.97( $\pm$ 5.90)  | -1( $\pm$ 0)                   |
|          | 1000            | 97.20( $\pm$ 0.29) | 77.70( $\pm$ 2.33)  | -1( $\pm$ 0)                   |



**Table S25:** The results of all mnist38-based datasets categorized by imbalance ratios.

| Method   | min_maj_rate | maj_F1( $\pm$ CI)%  | min_F1( $\pm$ CI)%  | Stopping Iteration( $\pm$ STD) |
|----------|--------------|---------------------|---------------------|--------------------------------|
| CAS_real | 0.1          | 97.96( $\pm$ 0.50)  | 74.45( $\pm$ 14.54) | 2330( $\pm$ 1605)              |
|          | 0.2          | 96.16( $\pm$ 1.41)  | 74.45( $\pm$ 14.90) | 1885( $\pm$ 1093)              |
|          | 0.3          | 96.33( $\pm$ 2.74)  | 87.99( $\pm$ 20.11) | 2215( $\pm$ 1394)              |
|          | 0.4          | 93.50( $\pm$ 1.82)  | 74.70( $\pm$ 10.82) | 2395( $\pm$ 1148)              |
| CAS_syn  | 0.1          | 97.73( $\pm$ 1.00)  | 68.46( $\pm$ 13.26) | 1100( $\pm$ 1062)              |
|          | 0.2          | 96.22( $\pm$ 1.30)  | 80.61( $\pm$ 3.88)  | 1345( $\pm$ 1008)              |
|          | 0.3          | 95.95( $\pm$ 2.04)  | 84.13( $\pm$ 8.27)  | 1370( $\pm$ 1380)              |
|          | 0.4          | 90.44( $\pm$ 1.42)  | 84.97( $\pm$ 4.14)  | 1810( $\pm$ 1176)              |
| CDS      | 0.1          | 93.04( $\pm$ 13.13) | 71.70( $\pm$ 12.89) | 2190( $\pm$ 1489)              |
|          | 0.2          | 96.58( $\pm$ 4.68)  | 82.31( $\pm$ 6.48)  | 2440( $\pm$ 1699)              |
|          | 0.3          | 95.63( $\pm$ 0.85)  | 84.24( $\pm$ 3.28)  | 2990( $\pm$ 1856)              |
|          | 0.4          | 96.09( $\pm$ 1.18)  | 89.09( $\pm$ 2.85)  | 1880( $\pm$ 1046)              |
| FCD      | 0.1          | 92.91( $\pm$ 13.76) | 70.33( $\pm$ 16.22) | 2135( $\pm$ 1252)              |
|          | 0.2          | 94.69( $\pm$ 0.94)  | 77.30( $\pm$ 5.44)  | 2540( $\pm$ 1764)              |
|          | 0.3          | 96.02( $\pm$ 1.53)  | 86.06( $\pm$ 7.18)  | 2790( $\pm$ 2141)              |
|          | 0.4          | 95.94( $\pm$ 0.72)  | 89.93( $\pm$ 3.88)  | 2655( $\pm$ 1840)              |
| FID      | 0.1          | 96.71( $\pm$ 0.51)  | 61.65( $\pm$ 10.32) | 3360( $\pm$ 1160)              |
|          | 0.2          | 96.65( $\pm$ 1.39)  | 81.42( $\pm$ 5.50)  | 3395( $\pm$ 1126)              |
|          | 0.3          | 96.52( $\pm$ 1.09)  | 87.64( $\pm$ 5.66)  | 4015( $\pm$ 1709)              |
|          | 0.4          | 95.51( $\pm$ 12.79) | 88.02( $\pm$ 7.07)  | 3795( $\pm$ 1178)              |
| Fixed    | 0.1          | 97.63( $\pm$ 0.38)  | 69.37( $\pm$ 7.74)  | 5000( $\pm$ 0)                 |
|          | 0.2          | 95.74( $\pm$ 1.10)  | 79.04( $\pm$ 14.22) | 5000( $\pm$ 0)                 |
|          | 0.3          | 95.60( $\pm$ 1.05)  | 84.42( $\pm$ 3.00)  | 5000( $\pm$ 0)                 |
|          | 0.4          | 95.79( $\pm$ 4.15)  | 88.85( $\pm$ 24.87) | 5000( $\pm$ 0)                 |
| Initial  | 0.1          | 96.40( $\pm$ 1.30)  | 33.47( $\pm$ 20.40) | -1( $\pm$ 0)                   |
|          | 0.2          | 95.90( $\pm$ 0.98)  | 70.48( $\pm$ 7.84)  | -1( $\pm$ 0)                   |
|          | 0.3          | 94.34( $\pm$ 0.87)  | 73.34( $\pm$ 3.56)  | -1( $\pm$ 0)                   |
|          | 0.4          | 94.45( $\pm$ 1.48)  | 81.25( $\pm$ 2.78)  | -1( $\pm$ 0)                   |

**Table S26:** The results of all mnist38-based datasets categorized by majority class counts.

| Method   | maj_class_count | maj_F1( $\pm$ CI)%  | min_F1( $\pm$ CI)%  | Stopping Iteration( $\pm$ STD) |
|----------|-----------------|---------------------|---------------------|--------------------------------|
| CAS_real | 100             | 94.68( $\pm$ 1.44)  | 73.54( $\pm$ 17.63) | 950( $\pm$ 539)                |
|          | 200             | 96.55( $\pm$ 2.02)  | 77.84( $\pm$ 14.75) | 2035( $\pm$ 987)               |
|          | 500             | 95.81( $\pm$ 0.81)  | 76.57( $\pm$ 10.97) | 2830( $\pm$ 1292)              |
|          | 1000            | 96.91( $\pm$ 1.54)  | 83.62( $\pm$ 21.89) | 3010( $\pm$ 1216)              |
| CAS_syn  | 100             | 95.09( $\pm$ 2.86)  | 71.44( $\pm$ 12.98) | 1025( $\pm$ 627)               |
|          | 200             | 91.04( $\pm$ 0.79)  | 74.25( $\pm$ 8.79)  | 1320( $\pm$ 881)               |
|          | 500             | 97.00( $\pm$ 1.20)  | 85.62( $\pm$ 5.09)  | 1580( $\pm$ 1374)              |
|          | 1000            | 97.22( $\pm$ 0.21)  | 86.86( $\pm$ 2.80)  | 1700( $\pm$ 1539)              |
| CDS      | 100             | 96.10( $\pm$ 4.79)  | 79.17( $\pm$ 19.03) | 3270( $\pm$ 2103)              |
|          | 200             | 96.07( $\pm$ 12.91) | 77.84( $\pm$ 9.42)  | 2595( $\pm$ 1540)              |
|          | 500             | 91.88( $\pm$ 0.90)  | 82.69( $\pm$ 4.72)  | 1740( $\pm$ 631)               |
|          | 1000            | 97.30( $\pm$ 0.74)  | 87.66( $\pm$ 3.27)  | 1895( $\pm$ 1260)              |
| FCD      | 100             | 94.30( $\pm$ 1.67)  | 74.84( $\pm$ 5.76)  | 930( $\pm$ 277)                |
|          | 200             | 91.36( $\pm$ 1.41)  | 76.30( $\pm$ 10.30) | 1510( $\pm$ 261)               |
|          | 500             | 96.78( $\pm$ 13.35) | 85.25( $\pm$ 7.83)  | 2990( $\pm$ 876)               |
|          | 1000            | 97.13( $\pm$ 0.29)  | 87.23( $\pm$ 1.47)  | 4690( $\pm$ 1751)              |
| FID      | 100             | 95.09( $\pm$ 1.83)  | 72.01( $\pm$ 11.74) | 3810( $\pm$ 868)               |
|          | 200             | 96.32( $\pm$ 12.94) | 78.21( $\pm$ 12.72) | 4840( $\pm$ 1581)              |
|          | 500             | 96.89( $\pm$ 0.67)  | 85.83( $\pm$ 1.79)  | 2690( $\pm$ 785)               |
|          | 1000            | 97.10( $\pm$ 0.39)  | 82.68( $\pm$ 2.35)  | 3225( $\pm$ 835)               |
| Fixed    | 100             | 95.34( $\pm$ 2.15)  | 75.26( $\pm$ 12.99) | 5000( $\pm$ 0)                 |
|          | 200             | 95.60( $\pm$ 0.76)  | 75.12( $\pm$ 10.87) | 5000( $\pm$ 0)                 |
|          | 500             | 96.56( $\pm$ 1.56)  | 84.63( $\pm$ 14.18) | 5000( $\pm$ 0)                 |
|          | 1000            | 97.26( $\pm$ 1.97)  | 86.68( $\pm$ 12.98) | 5000( $\pm$ 0)                 |
| Initial  | 100             | 93.88( $\pm$ 1.66)  | 49.05( $\pm$ 6.93)  | -1( $\pm$ 0)                   |
|          | 200             | 94.35( $\pm$ 1.56)  | 55.35( $\pm$ 10.61) | -1( $\pm$ 0)                   |
|          | 500             | 96.24( $\pm$ 0.44)  | 76.57( $\pm$ 1.37)  | -1( $\pm$ 0)                   |
|          | 1000            | 96.62( $\pm$ 0.41)  | 77.57( $\pm$ 9.76)  | -1( $\pm$ 0)                   |

**Table S27:** The results of all kmnist12-based datasets categorized by imbalance ratios.

| Method   | min_maj_rate | maj_F1( $\pm$ CI)% | min_F1( $\pm$ CI)%  | Stopping Iteration( $\pm$ STD) |
|----------|--------------|--------------------|---------------------|--------------------------------|
| CAS_real | 0.1          | 95.62( $\pm$ 0.25) | 49.62( $\pm$ 3.79)  | 1980( $\pm$ 1111)              |
|          | 0.2          | 93.22( $\pm$ 1.36) | 64.19( $\pm$ 14.60) | 2045( $\pm$ 1294)              |
|          | 0.3          | 93.35( $\pm$ 1.52) | 72.93( $\pm$ 10.61) | 1900( $\pm$ 1049)              |
|          | 0.4          | 93.29( $\pm$ 1.98) | 79.87( $\pm$ 15.33) | 2195( $\pm$ 1025)              |
| CAS_syn  | 0.1          | 95.52( $\pm$ 1.62) | 48.07( $\pm$ 11.85) | 1800( $\pm$ 1324)              |
|          | 0.2          | 94.93( $\pm$ 0.75) | 69.15( $\pm$ 11.07) | 1610( $\pm$ 1410)              |
|          | 0.3          | 93.91( $\pm$ 1.60) | 78.05( $\pm$ 5.39)  | 1835( $\pm$ 808)               |
|          | 0.4          | 94.07( $\pm$ 1.01) | 83.34( $\pm$ 2.40)  | 1730( $\pm$ 1554)              |
| CDS      | 0.1          | 96.49( $\pm$ 2.08) | 54.48( $\pm$ 12.20) | 1445( $\pm$ 1183)              |
|          | 0.2          | 94.59( $\pm$ 1.17) | 69.90( $\pm$ 9.36)  | 2740( $\pm$ 1495)              |
|          | 0.3          | 93.30( $\pm$ 1.66) | 77.65( $\pm$ 6.47)  | 2375( $\pm$ 1557)              |
|          | 0.4          | 93.59( $\pm$ 1.21) | 84.00( $\pm$ 6.59)  | 2160( $\pm$ 1500)              |
| FCD      | 0.1          | 95.61( $\pm$ 1.71) | 50.57( $\pm$ 21.29) | 1135( $\pm$ 718)               |
|          | 0.2          | 94.78( $\pm$ 1.66) | 66.17( $\pm$ 11.14) | 1490( $\pm$ 1060)              |
|          | 0.3          | 94.18( $\pm$ 3.27) | 79.19( $\pm$ 8.85)  | 1265( $\pm$ 657)               |
|          | 0.4          | 93.49( $\pm$ 1.44) | 82.15( $\pm$ 2.71)  | 1645( $\pm$ 1090)              |
| FID      | 0.1          | 96.32( $\pm$ 1.80) | 55.50( $\pm$ 14.57) | 3845( $\pm$ 1538)              |
|          | 0.2          | 94.11( $\pm$ 0.43) | 60.03( $\pm$ 7.91)  | 4200( $\pm$ 1798)              |
|          | 0.3          | 93.13( $\pm$ 1.05) | 74.96( $\pm$ 4.36)  | 3795( $\pm$ 1632)              |
|          | 0.4          | 92.91( $\pm$ 0.72) | 78.60( $\pm$ 3.18)  | 4240( $\pm$ 1635)              |
| Fixed    | 0.1          | 96.36( $\pm$ 2.01) | 55.27( $\pm$ 12.93) | 7500( $\pm$ 0)                 |
|          | 0.2          | 94.47( $\pm$ 2.45) | 65.62( $\pm$ 9.19)  | 7500( $\pm$ 0)                 |
|          | 0.3          | 93.14( $\pm$ 1.38) | 75.92( $\pm$ 10.66) | 7500( $\pm$ 0)                 |
|          | 0.4          | 93.55( $\pm$ 2.13) | 83.26( $\pm$ 12.56) | 7500( $\pm$ 0)                 |
| Initial  | 0.1          | 95.91( $\pm$ 1.74) | 28.02( $\pm$ 15.75) | -1( $\pm$ 0)                   |
|          | 0.2          | 93.85( $\pm$ 0.85) | 51.78( $\pm$ 12.21) | -1( $\pm$ 0)                   |
|          | 0.3          | 93.50( $\pm$ 1.41) | 70.73( $\pm$ 4.48)  | -1( $\pm$ 0)                   |
|          | 0.4          | 92.16( $\pm$ 0.82) | 73.32( $\pm$ 4.23)  | -1( $\pm$ 0)                   |

**Table S28:** The results of all kmnist12-based datasets categorized by majority class counts.

| Method   | maj_class_count | maj_F1( $\pm$ CI)% | min_F1( $\pm$ CI)%  | Stopping Iteration( $\pm$ STD) |
|----------|-----------------|--------------------|---------------------|--------------------------------|
| CAS_real | 100             | 90.74( $\pm$ 1.24) | 45.12( $\pm$ 9.60)  | 895( $\pm$ 337)                |
|          | 200             | 93.85( $\pm$ 1.30) | 65.29( $\pm$ 12.33) | 1625( $\pm$ 497)               |
|          | 500             | 94.93( $\pm$ 1.16) | 75.98( $\pm$ 12.36) | 2585( $\pm$ 812)               |
|          | 1000            | 95.95( $\pm$ 1.03) | 80.21( $\pm$ 5.74)  | 3015( $\pm$ 1103)              |
| CAS_syn  | 100             | 92.97( $\pm$ 2.29) | 59.06( $\pm$ 24.72) | 1250( $\pm$ 862)               |
|          | 200             | 94.14( $\pm$ 2.09) | 64.58( $\pm$ 10.36) | 1415( $\pm$ 696)               |
|          | 500             | 94.96( $\pm$ 0.32) | 74.31( $\pm$ 2.83)  | 2120( $\pm$ 1658)              |
|          | 1000            | 96.34( $\pm$ 0.91) | 80.65( $\pm$ 3.87)  | 2190( $\pm$ 1461)              |
| CDS      | 100             | 93.75( $\pm$ 4.07) | 64.16( $\pm$ 18.67) | 2960( $\pm$ 1597)              |
|          | 200             | 93.00( $\pm$ 1.18) | 66.08( $\pm$ 9.35)  | 2480( $\pm$ 1804)              |
|          | 500             | 94.88( $\pm$ 0.99) | 74.75( $\pm$ 6.05)  | 1770( $\pm$ 1086)              |
|          | 1000            | 96.34( $\pm$ 0.31) | 81.04( $\pm$ 2.34)  | 1510( $\pm$ 936)               |
| FCD      | 100             | 92.83( $\pm$ 2.26) | 52.77( $\pm$ 25.42) | 625( $\pm$ 144)                |
|          | 200             | 94.45( $\pm$ 2.58) | 70.29( $\pm$ 12.73) | 855( $\pm$ 216)                |
|          | 500             | 94.83( $\pm$ 0.44) | 74.67( $\pm$ 2.55)  | 1730( $\pm$ 545)               |
|          | 1000            | 95.94( $\pm$ 0.56) | 80.35( $\pm$ 4.52)  | 2325( $\pm$ 1049)              |
| FID      | 100             | 92.29( $\pm$ 1.89) | 55.93( $\pm$ 18.15) | 3075( $\pm$ 1167)              |
|          | 200             | 93.32( $\pm$ 0.76) | 60.99( $\pm$ 9.98)  | 4675( $\pm$ 1392)              |
|          | 500             | 94.76( $\pm$ 0.72) | 71.41( $\pm$ 7.54)  | 4630( $\pm$ 1886)              |
|          | 1000            | 96.10( $\pm$ 1.06) | 80.75( $\pm$ 8.52)  | 3700( $\pm$ 1537)              |
| Fixed    | 100             | 92.99( $\pm$ 5.71) | 55.75( $\pm$ 8.07)  | 7500( $\pm$ 0)                 |
|          | 200             | 94.15( $\pm$ 1.49) | 70.38( $\pm$ 12.50) | 7500( $\pm$ 0)                 |
|          | 500             | 94.70( $\pm$ 0.82) | 74.41( $\pm$ 4.01)  | 7500( $\pm$ 0)                 |
|          | 1000            | 95.69( $\pm$ 0.46) | 79.54( $\pm$ 2.96)  | 7500( $\pm$ 0)                 |
| Initial  | 100             | 92.14( $\pm$ 1.09) | 29.63( $\pm$ 11.54) | -1( $\pm$ 0)                   |
|          | 200             | 93.29( $\pm$ 1.22) | 51.55( $\pm$ 11.83) | -1( $\pm$ 0)                   |
|          | 500             | 94.46( $\pm$ 0.84) | 67.30( $\pm$ 11.17) | -1( $\pm$ 0)                   |
|          | 1000            | 95.53( $\pm$ 0.35) | 75.35( $\pm$ 3.37)  | -1( $\pm$ 0)                   |

**Table S29:** The results of all kmnist16-based datasets categorized by imbalance ratios.

| Method   | min_maj_rate | maj_F1( $\pm$ CI)% | min_F1( $\pm$ CI)%  | Stopping Iteration( $\pm$ STD) |
|----------|--------------|--------------------|---------------------|--------------------------------|
| CAS_real | 0.1          | 96.68( $\pm$ 0.44) | 65.79( $\pm$ 8.61)  | 1600( $\pm$ 1106)              |
|          | 0.2          | 96.34( $\pm$ 1.52) | 79.18( $\pm$ 16.52) | 1450( $\pm$ 698)               |
|          | 0.3          | 95.08( $\pm$ 0.70) | 81.58( $\pm$ 4.17)  | 1855( $\pm$ 987)               |
|          | 0.4          | 94.72( $\pm$ 2.35) | 86.49( $\pm$ 8.71)  | 2025( $\pm$ 1115)              |
| CAS_syn  | 0.1          | 97.30( $\pm$ 0.65) | 65.07( $\pm$ 19.33) | 945( $\pm$ 1036)               |
|          | 0.2          | 96.53( $\pm$ 1.88) | 80.64( $\pm$ 11.65) | 930( $\pm$ 1371)               |
|          | 0.3          | 95.50( $\pm$ 2.93) | 84.50( $\pm$ 5.53)  | 1135( $\pm$ 1062)              |
|          | 0.4          | 94.31( $\pm$ 1.64) | 84.24( $\pm$ 5.91)  | 1610( $\pm$ 1219)              |
| CDS      | 0.1          | 96.94( $\pm$ 1.02) | 56.47( $\pm$ 15.57) | 2245( $\pm$ 1335)              |
|          | 0.2          | 96.47( $\pm$ 1.96) | 80.94( $\pm$ 11.03) | 1850( $\pm$ 1325)              |
|          | 0.3          | 95.50( $\pm$ 1.02) | 82.15( $\pm$ 4.86)  | 2040( $\pm$ 1020)              |
|          | 0.4          | 93.91( $\pm$ 1.24) | 82.69( $\pm$ 3.65)  | 2015( $\pm$ 1476)              |
| FCD      | 0.1          | 97.00( $\pm$ 0.40) | 62.15( $\pm$ 9.50)  | 1070( $\pm$ 460)               |
|          | 0.2          | 95.94( $\pm$ 1.01) | 78.69( $\pm$ 5.61)  | 1205( $\pm$ 776)               |
|          | 0.3          | 95.54( $\pm$ 1.09) | 84.30( $\pm$ 7.82)  | 1250( $\pm$ 791)               |
|          | 0.4          | 94.72( $\pm$ 2.03) | 86.17( $\pm$ 7.59)  | 1280( $\pm$ 738)               |
| FID      | 0.1          | 96.29( $\pm$ 0.59) | 61.99( $\pm$ 12.98) | 3555( $\pm$ 1427)              |
|          | 0.2          | 95.67( $\pm$ 1.34) | 76.01( $\pm$ 7.93)  | 3325( $\pm$ 1623)              |
|          | 0.3          | 95.04( $\pm$ 1.45) | 81.07( $\pm$ 4.81)  | 3645( $\pm$ 1527)              |
|          | 0.4          | 94.34( $\pm$ 1.68) | 83.47( $\pm$ 6.02)  | 3655( $\pm$ 1504)              |
| Fixed    | 0.1          | 96.93( $\pm$ 2.12) | 57.53( $\pm$ 15.64) | 7500( $\pm$ 0)                 |
|          | 0.2          | 96.64( $\pm$ 1.25) | 81.22( $\pm$ 6.76)  | 7500( $\pm$ 0)                 |
|          | 0.3          | 94.28( $\pm$ 1.69) | 81.56( $\pm$ 8.51)  | 7500( $\pm$ 0)                 |
|          | 0.4          | 94.08( $\pm$ 0.79) | 83.51( $\pm$ 2.82)  | 7500( $\pm$ 0)                 |
| Initial  | 0.1          | 96.40( $\pm$ 1.71) | 38.79( $\pm$ 10.39) | -1( $\pm$ 0)                   |
|          | 0.2          | 95.53( $\pm$ 1.83) | 69.77( $\pm$ 9.78)  | -1( $\pm$ 0)                   |
|          | 0.3          | 95.42( $\pm$ 1.44) | 82.34( $\pm$ 6.18)  | -1( $\pm$ 0)                   |
|          | 0.4          | 93.50( $\pm$ 2.59) | 80.78( $\pm$ 9.38)  | -1( $\pm$ 0)                   |

**Table S30:** The results of all kmnist16-based datasets categorized by majority class counts.

| Method   | maj_class_count | maj_F1( $\pm$ CI)% | min_F1( $\pm$ CI)%  | Stopping Iteration( $\pm$ STD) |
|----------|-----------------|--------------------|---------------------|--------------------------------|
| CAS_real | 100             | 94.84( $\pm$ 1.84) | 73.60( $\pm$ 12.68) | 715( $\pm$ 316)                |
|          | 200             | 95.25( $\pm$ 2.14) | 74.34( $\pm$ 12.58) | 1425( $\pm$ 637)               |
|          | 500             | 95.92( $\pm$ 0.71) | 80.21( $\pm$ 6.15)  | 2240( $\pm$ 650)               |
|          | 1000            | 96.81( $\pm$ 0.42) | 84.89( $\pm$ 3.24)  | 2550( $\pm$ 1023)              |
| CAS_syn  | 100             | 95.38( $\pm$ 1.75) | 75.25( $\pm$ 20.09) | 580( $\pm$ 342)                |
|          | 200             | 95.51( $\pm$ 0.79) | 75.80( $\pm$ 10.48) | 1230( $\pm$ 1003)              |
|          | 500             | 95.97( $\pm$ 0.94) | 78.89( $\pm$ 6.05)  | 1755( $\pm$ 1854)              |
|          | 1000            | 96.79( $\pm$ 0.71) | 84.51( $\pm$ 4.24)  | 1055( $\pm$ 763)               |
| CDS      | 100             | 94.94( $\pm$ 2.00) | 64.00( $\pm$ 18.90) | 2725( $\pm$ 1501)              |
|          | 200             | 95.26( $\pm$ 1.26) | 74.31( $\pm$ 7.88)  | 2050( $\pm$ 1180)              |
|          | 500             | 95.88( $\pm$ 1.21) | 79.85( $\pm$ 5.67)  | 1570( $\pm$ 828)               |
|          | 1000            | 96.74( $\pm$ 0.62) | 84.09( $\pm$ 3.68)  | 1805( $\pm$ 1313)              |
| FCD      | 100             | 96.11( $\pm$ 2.55) | 76.54( $\pm$ 16.39) | 615( $\pm$ 118)                |
|          | 200             | 94.45( $\pm$ 1.35) | 71.09( $\pm$ 7.72)  | 880( $\pm$ 196)                |
|          | 500             | 95.87( $\pm$ 0.88) | 79.12( $\pm$ 4.57)  | 1410( $\pm$ 494)               |
|          | 1000            | 96.77( $\pm$ 0.65) | 84.57( $\pm$ 4.72)  | 1900( $\pm$ 829)               |
| FID      | 100             | 93.62( $\pm$ 2.16) | 63.89( $\pm$ 16.35) | 3305( $\pm$ 1520)              |
|          | 200             | 94.91( $\pm$ 1.45) | 73.84( $\pm$ 9.07)  | 4775( $\pm$ 1575)              |
|          | 500             | 96.08( $\pm$ 1.03) | 80.69( $\pm$ 7.59)  | 2965( $\pm$ 1193)              |
|          | 1000            | 96.73( $\pm$ 0.49) | 84.13( $\pm$ 3.60)  | 3135( $\pm$ 972)               |
| Fixed    | 100             | 94.53( $\pm$ 2.03) | 69.22( $\pm$ 10.02) | 7500( $\pm$ 0)                 |
|          | 200             | 94.85( $\pm$ 1.55) | 70.33( $\pm$ 11.08) | 7500( $\pm$ 0)                 |
|          | 500             | 95.81( $\pm$ 0.79) | 79.53( $\pm$ 3.54)  | 7500( $\pm$ 0)                 |
|          | 1000            | 96.75( $\pm$ 0.64) | 84.73( $\pm$ 3.62)  | 7500( $\pm$ 0)                 |
| Initial  | 100             | 94.28( $\pm$ 1.70) | 51.90( $\pm$ 9.11)  | -1( $\pm$ 0)                   |
|          | 200             | 94.06( $\pm$ 1.64) | 61.41( $\pm$ 9.87)  | -1( $\pm$ 0)                   |
|          | 500             | 95.74( $\pm$ 1.05) | 74.33( $\pm$ 6.55)  | -1( $\pm$ 0)                   |
|          | 1000            | 96.77( $\pm$ 0.24) | 84.02( $\pm$ 0.78)  | -1( $\pm$ 0)                   |

**Table S31:** The results of all kmnist35-based datasets categorized by imbalance ratios.

| Method   | min_maj_rate | maj_F1( $\pm$ CI)% | min_F1( $\pm$ CI)%  | Stopping Iteration( $\pm$ STD) |
|----------|--------------|--------------------|---------------------|--------------------------------|
| CAS_real | 0.1          | 97.84( $\pm$ 0.63) | 73.45( $\pm$ 14.48) | 1415( $\pm$ 835)               |
|          | 0.2          | 96.25( $\pm$ 0.34) | 81.98( $\pm$ 7.18)  | 1705( $\pm$ 861)               |
|          | 0.3          | 96.57( $\pm$ 1.58) | 88.57( $\pm$ 10.72) | 1920( $\pm$ 1665)              |
|          | 0.4          | 94.45( $\pm$ 1.39) | 85.63( $\pm$ 4.91)  | 2005( $\pm$ 1338)              |
| CAS_syn  | 0.1          | 97.87( $\pm$ 0.66) | 70.83( $\pm$ 7.74)  | 1555( $\pm$ 1698)              |
|          | 0.2          | 96.65( $\pm$ 1.41) | 81.49( $\pm$ 9.10)  | 1250( $\pm$ 786)               |
|          | 0.3          | 96.33( $\pm$ 1.02) | 87.05( $\pm$ 3.29)  | 1095( $\pm$ 846)               |
|          | 0.4          | 95.70( $\pm$ 1.95) | 88.29( $\pm$ 9.17)  | 1770( $\pm$ 1547)              |
| CDS      | 0.1          | 98.43( $\pm$ 0.95) | 80.39( $\pm$ 18.29) | 1640( $\pm$ 1211)              |
|          | 0.2          | 96.58( $\pm$ 2.22) | 81.85( $\pm$ 10.63) | 1745( $\pm$ 983)               |
|          | 0.3          | 96.62( $\pm$ 1.13) | 88.19( $\pm$ 2.98)  | 2395( $\pm$ 1536)              |
|          | 0.4          | 95.48( $\pm$ 2.04) | 87.37( $\pm$ 6.95)  | 1845( $\pm$ 1221)              |
| FCD      | 0.1          | 97.93( $\pm$ 0.72) | 72.33( $\pm$ 13.24) | 1455( $\pm$ 899)               |
|          | 0.2          | 96.91( $\pm$ 2.76) | 84.61( $\pm$ 11.18) | 1340( $\pm$ 910)               |
|          | 0.3          | 96.15( $\pm$ 0.82) | 86.64( $\pm$ 3.21)  | 1575( $\pm$ 1033)              |
|          | 0.4          | 95.03( $\pm$ 1.91) | 86.26( $\pm$ 7.42)  | 1450( $\pm$ 1020)              |
| FID      | 0.1          | 98.29( $\pm$ 0.15) | 80.84( $\pm$ 7.63)  | 4255( $\pm$ 2008)              |
|          | 0.2          | 96.02( $\pm$ 1.95) | 79.39( $\pm$ 10.80) | 3575( $\pm$ 1472)              |
|          | 0.3          | 95.99( $\pm$ 0.80) | 85.83( $\pm$ 2.98)  | 3790( $\pm$ 1521)              |
|          | 0.4          | 95.07( $\pm$ 1.70) | 87.25( $\pm$ 5.26)  | 3565( $\pm$ 1324)              |
| Fixed    | 0.1          | 98.21( $\pm$ 0.95) | 80.19( $\pm$ 17.71) | 7500( $\pm$ 0)                 |
|          | 0.2          | 96.82( $\pm$ 2.24) | 81.63( $\pm$ 9.33)  | 7500( $\pm$ 0)                 |
|          | 0.3          | 96.47( $\pm$ 0.75) | 87.70( $\pm$ 2.45)  | 7500( $\pm$ 0)                 |
|          | 0.4          | 94.52( $\pm$ 3.40) | 83.12( $\pm$ 7.95)  | 7500( $\pm$ 0)                 |
| Initial  | 0.1          | 97.23( $\pm$ 0.42) | 53.71( $\pm$ 4.60)  | -1( $\pm$ 0)                   |
|          | 0.2          | 96.57( $\pm$ 1.16) | 77.75( $\pm$ 3.33)  | -1( $\pm$ 0)                   |
|          | 0.3          | 96.48( $\pm$ 1.35) | 85.76( $\pm$ 3.47)  | -1( $\pm$ 0)                   |
|          | 0.4          | 95.15( $\pm$ 0.96) | 85.19( $\pm$ 3.15)  | -1( $\pm$ 0)                   |

**Table S32:** The results of all kmnist35-based datasets categorized by majority class counts.

| Method   | maj_class_count | maj_F1( $\pm$ CI)% | min_F1( $\pm$ CI)%  | Stopping Iteration( $\pm$ STD) |
|----------|-----------------|--------------------|---------------------|--------------------------------|
| CAS_real | 100             | 95.23( $\pm$ 1.16) | 74.98( $\pm$ 13.98) | 735( $\pm$ 258)                |
|          | 200             | 95.37( $\pm$ 1.24) | 80.85( $\pm$ 12.50) | 1335( $\pm$ 425)               |
|          | 500             | 97.09( $\pm$ 1.06) | 85.80( $\pm$ 12.75) | 2035( $\pm$ 622)               |
|          | 1000            | 97.41( $\pm$ 0.59) | 88.00( $\pm$ 3.42)  | 2940( $\pm$ 1657)              |
| CAS_syn  | 100             | 95.39( $\pm$ 1.59) | 70.00( $\pm$ 11.28) | 730( $\pm$ 419)                |
|          | 200             | 96.54( $\pm$ 1.53) | 83.67( $\pm$ 3.50)  | 975( $\pm$ 513)                |
|          | 500             | 96.97( $\pm$ 0.75) | 85.49( $\pm$ 3.83)  | 1815( $\pm$ 1100)              |
|          | 1000            | 97.64( $\pm$ 0.58) | 88.49( $\pm$ 3.21)  | 2150( $\pm$ 1954)              |
| CDS      | 100             | 95.30( $\pm$ 1.82) | 74.88( $\pm$ 17.35) | 2300( $\pm$ 1298)              |
|          | 200             | 96.66( $\pm$ 1.55) | 86.23( $\pm$ 8.57)  | 2340( $\pm$ 1525)              |
|          | 500             | 97.62( $\pm$ 0.57) | 88.66( $\pm$ 3.63)  | 1405( $\pm$ 994)               |
|          | 1000            | 97.53( $\pm$ 0.47) | 88.03( $\pm$ 3.37)  | 1580( $\pm$ 952)               |
| FCD      | 100             | 95.35( $\pm$ 2.15) | 73.08( $\pm$ 15.65) | 530( $\pm$ 162)                |
|          | 200             | 96.18( $\pm$ 1.62) | 82.54( $\pm$ 7.47)  | 880( $\pm$ 260)                |
|          | 500             | 97.09( $\pm$ 0.88) | 86.50( $\pm$ 5.05)  | 1740( $\pm$ 451)               |
|          | 1000            | 97.40( $\pm$ 0.73) | 87.74( $\pm$ 3.05)  | 2670( $\pm$ 767)               |
| FID      | 100             | 95.66( $\pm$ 1.26) | 80.36( $\pm$ 12.95) | 3565( $\pm$ 1065)              |
|          | 200             | 95.81( $\pm$ 1.52) | 80.82( $\pm$ 6.13)  | 4575( $\pm$ 1837)              |
|          | 500             | 96.58( $\pm$ 0.75) | 84.69( $\pm$ 2.99)  | 3600( $\pm$ 1991)              |
|          | 1000            | 97.31( $\pm$ 0.63) | 87.45( $\pm$ 2.81)  | 3445( $\pm$ 1122)              |
| Fixed    | 100             | 95.15( $\pm$ 2.06) | 74.90( $\pm$ 13.84) | 7500( $\pm$ 0)                 |
|          | 200             | 96.00( $\pm$ 3.98) | 82.60( $\pm$ 11.31) | 7500( $\pm$ 0)                 |
|          | 500             | 97.33( $\pm$ 0.97) | 86.79( $\pm$ 5.27)  | 7500( $\pm$ 0)                 |
|          | 1000            | 97.54( $\pm$ 0.51) | 88.36( $\pm$ 1.62)  | 7500( $\pm$ 0)                 |
| Initial  | 100             | 94.98( $\pm$ 1.06) | 60.06( $\pm$ 6.24)  | -1( $\pm$ 0)                   |
|          | 200             | 95.83( $\pm$ 1.78) | 73.08( $\pm$ 6.32)  | -1( $\pm$ 0)                   |
|          | 500             | 96.82( $\pm$ 0.79) | 80.86( $\pm$ 3.63)  | -1( $\pm$ 0)                   |
|          | 1000            | 97.80( $\pm$ 0.60) | 88.40( $\pm$ 3.07)  | -1( $\pm$ 0)                   |



**Table S33:** The results of all tor-based datasets categorized by imbalance ratios.

| Method  | min_maj_rate | maj_F1( $\pm$ CI)%    | min_F1( $\pm$ CI)%    | Stopping Iteration( $\pm$ STD) |
|---------|--------------|-----------------------|-----------------------|--------------------------------|
| cas     | 0.1          | 0.9159( $\pm$ 0.0122) | 0.5379( $\pm$ 0.3547) | 840( $\pm$ 653)                |
|         | 0.2          | 0.9174( $\pm$ 0.0114) | 0.7189( $\pm$ 0.1690) | 925( $\pm$ 488)                |
|         | 0.3          | 0.8712( $\pm$ 0.0178) | 0.7442( $\pm$ 0.0909) | 1015( $\pm$ 495)               |
|         | 0.4          | 0.8695( $\pm$ 0.0653) | 0.7699( $\pm$ 0.4563) | 1180( $\pm$ 731)               |
| fcn     | 0.1          | 0.9161( $\pm$ 0.0654) | 0.5694( $\pm$ 0.1415) | 2535( $\pm$ 1499)              |
|         | 0.2          | 0.8558( $\pm$ 0.0613) | 0.6274( $\pm$ 0.1454) | 2595( $\pm$ 1727)              |
|         | 0.3          | 0.8799( $\pm$ 0.0830) | 0.7581( $\pm$ 0.1570) | 2245( $\pm$ 1556)              |
|         | 0.4          | 0.9125( $\pm$ 0.0801) | 0.8102( $\pm$ 0.0834) | 2490( $\pm$ 1253)              |
| fixed   | 0.1          | 0.9051( $\pm$ 0.0391) | 0.5526( $\pm$ 0.0724) | 1500( $\pm$ 0)                 |
|         | 0.2          | 0.9177( $\pm$ 0.0752) | 0.7166( $\pm$ 0.1749) | 1500( $\pm$ 0)                 |
|         | 0.3          | 0.9121( $\pm$ 0.0737) | 0.7673( $\pm$ 0.1971) | 1500( $\pm$ 0)                 |
|         | 0.4          | 0.8684( $\pm$ 0.0926) | 0.7746( $\pm$ 0.1285) | 1500( $\pm$ 0)                 |
| mfid    | 0.1          | 0.8527( $\pm$ 0.0898) | 0.4214( $\pm$ 0.1412) | 995( $\pm$ 858)                |
|         | 0.2          | 0.9204( $\pm$ 0.0941) | 0.7211( $\pm$ 0.1999) | 990( $\pm$ 576)                |
|         | 0.3          | 0.8922( $\pm$ 0.2823) | 0.7208( $\pm$ 0.1732) | 1070( $\pm$ 392)               |
|         | 0.4          | 0.8995( $\pm$ 0.0953) | 0.7972( $\pm$ 0.1338) | 895( $\pm$ 321)                |
| mis     | 0.1          | 0.8953( $\pm$ 0.0621) | 0.5153( $\pm$ 0.1257) | 2165( $\pm$ 1355)              |
|         | 0.2          | 0.9042( $\pm$ 0.2495) | 0.6978( $\pm$ 0.1738) | 1550( $\pm$ 1338)              |
|         | 0.3          | 0.8568( $\pm$ 0.2532) | 0.7318( $\pm$ 0.1643) | 1090( $\pm$ 544)               |
|         | 0.4          | 0.9093( $\pm$ 0.0533) | 0.8114( $\pm$ 0.0678) | 1355( $\pm$ 472)               |
| Initial | 0.1          | 0.9533( $\pm$ 0.1138) | 0.0968( $\pm$ 0.1452) | -1( $\pm$ 0)                   |
|         | 0.2          | 0.9141( $\pm$ 0.0897) | 0.1751( $\pm$ 0.1857) | -1( $\pm$ 0)                   |
|         | 0.3          | 0.8986( $\pm$ 0.1992) | 0.4137( $\pm$ 0.1123) | -1( $\pm$ 0)                   |
|         | 0.4          | 0.8906( $\pm$ 0.1843) | 0.5352( $\pm$ 0.2120) | -1( $\pm$ 0)                   |

**Table S34:** The results of all tor-based datasets categorized by majority class counts.

| Method  | maj_class_count | maj_F1( $\pm$ CI)%    | min_F1( $\pm$ CI)%    | Stopping Iteration( $\pm$ STD) |
|---------|-----------------|-----------------------|-----------------------|--------------------------------|
| cas     | 100             | 0.8447( $\pm$ 0.0312) | 0.6192( $\pm$ 0.2372) | 920( $\pm$ 545)                |
|         | 200             | 0.8588( $\pm$ 0.0292) | 0.6373( $\pm$ 0.2681) | 870( $\pm$ 516)                |
|         | 500             | 0.9324( $\pm$ 0.0302) | 0.7643( $\pm$ 0.1807) | 1000( $\pm$ 538)               |
|         | 1000            | 0.9380( $\pm$ 0.0162) | 0.7499( $\pm$ 0.2158) | 1170( $\pm$ 778)               |
| fcf     | 100             | 0.7864( $\pm$ 0.1332) | 0.5862( $\pm$ 0.2461) | 1925( $\pm$ 1283)              |
|         | 200             | 0.8959( $\pm$ 0.0750) | 0.6525( $\pm$ 0.0960) | 2435( $\pm$ 1447)              |
|         | 500             | 0.9426( $\pm$ 0.0673) | 0.7658( $\pm$ 0.0985) | 2760( $\pm$ 1551)              |
|         | 1000            | 0.9394( $\pm$ 0.0141) | 0.7606( $\pm$ 0.0377) | 2745( $\pm$ 1633)              |
| fixed   | 100             | 0.8498( $\pm$ 0.1257) | 0.6288( $\pm$ 0.3360) | 1500( $\pm$ 0)                 |
|         | 200             | 0.9049( $\pm$ 0.0659) | 0.6950( $\pm$ 0.0852) | 1500( $\pm$ 0)                 |
|         | 500             | 0.9130( $\pm$ 0.0975) | 0.7307( $\pm$ 0.1639) | 1500( $\pm$ 0)                 |
|         | 1000            | 0.9357( $\pm$ 0.0169) | 0.7567( $\pm$ 0.0392) | 1500( $\pm$ 0)                 |
| mfid    | 100             | 0.8590( $\pm$ 0.2846) | 0.5872( $\pm$ 0.2733) | 855( $\pm$ 374)                |
|         | 200             | 0.8950( $\pm$ 0.0656) | 0.6738( $\pm$ 0.0878) | 1060( $\pm$ 789)               |
|         | 500             | 0.9135( $\pm$ 0.0262) | 0.7186( $\pm$ 0.0717) | 975( $\pm$ 546)                |
|         | 1000            | 0.8973( $\pm$ 0.0234) | 0.6809( $\pm$ 0.0721) | 1060( $\pm$ 501)               |
| mis     | 100             | 0.8180( $\pm$ 0.3394) | 0.5900( $\pm$ 0.2133) | 1440( $\pm$ 1083)              |
|         | 200             | 0.8763( $\pm$ 0.0589) | 0.6609( $\pm$ 0.1626) | 1510( $\pm$ 718)               |
|         | 500             | 0.9358( $\pm$ 0.0279) | 0.7541( $\pm$ 0.0787) | 1845( $\pm$ 1516)              |
|         | 1000            | 0.9355( $\pm$ 0.0101) | 0.7511( $\pm$ 0.0391) | 1365( $\pm$ 822)               |
| Initial | 100             | 0.8986( $\pm$ 0.1852) | 0.0996( $\pm$ 0.3561) | -1( $\pm$ 0)                   |
|         | 200             | 0.8946( $\pm$ 0.2321) | 0.1106( $\pm$ 0.3240) | -1( $\pm$ 0)                   |
|         | 500             | 0.9263( $\pm$ 0.0651) | 0.4033( $\pm$ 0.1360) | -1( $\pm$ 0)                   |
|         | 1000            | 0.9371( $\pm$ 0.0083) | 0.6073( $\pm$ 0.0434) | -1( $\pm$ 0)                   |
